# Supplementary material for: Porphyrin chemodosimeters: synthesis, electrochemical redox properties and selective ‘naked-eye’ detection of cyanide ions
Source: Royal Society of Chemistry journal article supplement (doi:10.1039/c5ra19847j), 2015-01-01
Supplement: c5ra19847j1.pdf [file c5ra19847j1.pdf]

## Electronic Supplementary Information (ESI) for

# Porphyrin Chemodosimeters: Synthesis, Electrochemical Redox Properties and Selective ‘Naked-eye’ Detection of Cyanide Ions

Mandeep K. Chahal and Muniappan Sankar\*

*Department of Chemistry, Indian Institute of Technology Roorkee, Roorkee-247667, India*

### Table of Contents

|                                                                                                                                                                                                                           | Page No |
|---------------------------------------------------------------------------------------------------------------------------------------------------------------------------------------------------------------------------|---------|
| <b>Scheme S1.</b> Synthetic route to dicyanovinyl appended $\beta$ -substituted porphyrins (1-4).                                                                                                                         | 3       |
| <b>Figure S1.</b> $^1\text{H}$ NMR spectrum of NiTPP-MN (1).                                                                                                                                                              | 4       |
| <b>Figure S2.</b> $^{13}\text{C}$ NMR spectrum of NiTPP-MN (1).                                                                                                                                                           | 4       |
| <b>Figure S3.</b> $^1\text{H}$ NMR spectrum of $\text{H}_2\text{TPP-MN}$ (2).                                                                                                                                             | 5       |
| <b>Figure S4.</b> $^1\text{H}$ NMR spectrum of NiOPP-MN (3).                                                                                                                                                              | 5       |
| <b>Figure S5.</b> $^{13}\text{C}$ NMR spectrum of NiOPP-MN (3).                                                                                                                                                           | 6       |
| <b>Figure S6.</b> $^1\text{H}$ NMR spectrum of $\text{H}_2\text{OPP-MN}$ (4).                                                                                                                                             | 6       |
| <b>Figure S7.</b> MALDI-TOF mass spectrum of NiTPP-MN (1).                                                                                                                                                                | 7       |
| <b>Figure S8.</b> ESI mass spectrum of $\text{H}_2\text{TPP-MN}$ (2).                                                                                                                                                     | 7       |
| <b>Figure S9.</b> MALDI-TOF mass spectrum of NiOPP-MN (3).                                                                                                                                                                | 8       |
| <b>Figure S10.</b> MALDI-TOF mass spectrum of $\text{H}_2\text{OPP-MN}$ (4).                                                                                                                                              | 8       |
| <b>Figure S11.</b> UV-Vis spectra of NiTPP-X (X = CHO, MN) derivatives in $\text{CH}_2\text{Cl}_2$ at 298 K.                                                                                                              | 9       |
| <b>Figure S12.</b> UV-Vis spectra of $\text{H}_2\text{TPP-X}$ (X = CHO, MN) derivatives in $\text{CH}_2\text{Cl}_2$ at 298 K.                                                                                             | 10      |
| <b>Figure S13.</b> UV-Vis spectra of $\text{H}_2\text{OPP-MN}$ (4) in toluene and DMSO (supports the nonplanar conformation as compared to $\text{H}_2\text{TPP-MN}$ ).                                                   | 10      |
| <b>Figure S14.</b> (a) The displacement of porphyrin-core atoms in Å from the mean plane and (b) bond lengths of 1.                                                                                                       | 11      |
| <b>Figure S15.</b> The HOMO-LUMO variation of various dicyanovinyl appended $\beta$ -substituted porphyrins: (a) free-base TPP-system (b) Ni-metallated TPP-system (c) free-base OPP-system (d) Ni-metallated OPP-system. | 12-13   |
| <b>Figure S16.</b> UV-Vis spectral response of 2 (8 $\mu\text{M}$ ) upon incremental addition of $\text{CN}^-$ (1.3 equiv.) in toluene.                                                                                   | 14      |
| <b>Figure S17.</b> UV-Vis spectral response of 3 (8 $\mu\text{M}$ ) upon incremental addition of $\text{CN}^-$ (2.5 equiv.) in toluene.                                                                                   | 14      |
| <b>Figure S18.</b> UV-Vis spectral response of 4 (8 $\mu\text{M}$ ) upon incremental addition of $\text{CN}^-$ (2.3 equiv.) in toluene.                                                                                   | 15      |
| <b>Figure S19.</b> Job's plot for the porphyrin chemodosimeters.                                                                                                                                                          | 15      |

|                                                                                                                                                                                                                                                                                                                                                                                                                                                                    |    |
|--------------------------------------------------------------------------------------------------------------------------------------------------------------------------------------------------------------------------------------------------------------------------------------------------------------------------------------------------------------------------------------------------------------------------------------------------------------------|----|
| <b>Figure S20.</b> UV-Vis spectra of <b>2</b> , <b>3</b> and <b>4</b> in toluene upon addition of various anions.                                                                                                                                                                                                                                                                                                                                                  | 16 |
| <b>Figure S21.</b> Visual-Colorimetric changes by addition of various anions to <b>2</b> .                                                                                                                                                                                                                                                                                                                                                                         | 17 |
| <b>Figure S22.</b> Visual-Colorimetric changes by addition of various anions to <b>3</b> .                                                                                                                                                                                                                                                                                                                                                                         | 17 |
| <b>Figure S23.</b> Ratiometric absorbance changes of <b>1</b> (A <sub>416</sub> /A <sub>450</sub> ), <b>2</b> (A <sub>419</sub> /A <sub>453</sub> ), <b>3</b> (A <sub>434</sub> /A <sub>462</sub> ) and <b>4</b> (A <sub>437</sub> /A <sub>460</sub> ) upon addition of CN <sup>-</sup> ions and 10 equiv. of other anions. Blue bars indicate the blank and various anions, and red bars indicate the addition of CN <sup>-</sup> ions to the interfering anions. | 18 |
| <b>Figure S24.</b> (a) Changes in absorption spectra of <b>1</b> incubated with CN <sup>-</sup> ions for 0–160 seconds. (b) Pseudo-first-order kinetic plot.                                                                                                                                                                                                                                                                                                       | 19 |
| <b>Figure S25.</b> <sup>1</sup> H NMR spectra of the adduct [ <b>3</b> -CN] <sup>-</sup> after addition of CN <sup>-</sup> ions (1 equiv.) to NiOPP-MN (5 × 10 <sup>-3</sup> M).                                                                                                                                                                                                                                                                                   | 20 |
| <b>Figure S26.</b> <sup>1</sup> H NMR spectra of the adduct [ <b>2</b> -CN] <sup>-</sup> after addition of CN <sup>-</sup> ions (1 equiv.) to H <sub>2</sub> TPP-MN (5 × 10 <sup>-3</sup> M).                                                                                                                                                                                                                                                                      | 20 |
| <b>Figure S27.</b> <sup>1</sup> H NMR spectra of the adduct [ <b>4</b> -CN] <sup>-</sup> after addition of CN <sup>-</sup> ions (1 equiv.) to H <sub>2</sub> OPP-MN (5 × 10 <sup>-3</sup> M).                                                                                                                                                                                                                                                                      | 21 |
| <b>Figure S28.</b> ESI-MS spectrum of the adduct [ <b>3</b> -CN] <sup>-</sup> after addition of CN <sup>-</sup> ions (1 equiv.) to NiOPP-MN( <b>3</b> ).                                                                                                                                                                                                                                                                                                           | 21 |
| <b>Figure S29.</b> Cyclic voltametric studies of <b>2-4</b> in absence and presence of [CN <sup>-</sup> ] in CH <sub>2</sub> Cl <sub>2</sub> containing 0.1 M TBAPF <sub>6</sub> at 298 K.                                                                                                                                                                                                                                                                         | 22 |
| <b>Figure S30.</b> DPV traces of <b>2-4</b> in absence and presence of [CN <sup>-</sup> ] in CH <sub>2</sub> Cl <sub>2</sub> containing 0.1 M TBAPF <sub>6</sub> at 298 K.                                                                                                                                                                                                                                                                                         | 23 |
| <b>Figure S31.</b> Optimized-geometries showing top as well as side views of NiTPP-MN (a and b) and NiOPP-MN (c and d), respectively.                                                                                                                                                                                                                                                                                                                              | 24 |
| <b>Figure S32.</b> Optimized-geometries showing top as well as side views of H <sub>2</sub> TPP-MN (a and b) and H <sub>2</sub> OPP-MN (c and d), respectively.                                                                                                                                                                                                                                                                                                    | 24 |
| <b>Figure S33.</b> Optimized-geometries for <b>1</b> -CN <sup>-</sup> , <b>2</b> -CN <sup>-</sup> , <b>3</b> -CN <sup>-</sup> and <b>4</b> -CN <sup>-</sup> .                                                                                                                                                                                                                                                                                                      | 25 |
| <b>Figure S34.</b> Pictorial representation of frontier orbitals of NiTPP-MN( <b>1</b> ).                                                                                                                                                                                                                                                                                                                                                                          | 26 |
| <b>Figure S35.</b> Pictorial representation of frontier orbitals of anionic species formed after the addition of CN <sup>-</sup> to NiTPP-MN ( <b>1</b> ).                                                                                                                                                                                                                                                                                                         | 26 |
| <b>Figure S36.</b> Pictorial representation of frontier orbitals of NiOPP-MN ( <b>3</b> ).                                                                                                                                                                                                                                                                                                                                                                         | 27 |
| <b>Figure S37.</b> Pictorial representation of frontier orbitals of anionic species formed after the addition of CN <sup>-</sup> to NiOPP-MN ( <b>3</b> ).                                                                                                                                                                                                                                                                                                         | 27 |
| <b>Figure S38.</b> UV-Vis spectral response of <b>1</b> (8 μM) upon incremental addition of CN <sup>-</sup> ions (0- 3.15 × 10 <sup>-4</sup> M) in 10% H <sub>2</sub> O:MeCN.                                                                                                                                                                                                                                                                                      | 29 |
| <b>Figure S39.</b> UV-Vis spectral response of <b>2</b> (8 μM) upon incremental addition of CN <sup>-</sup> ions (0-3.45 × 10 <sup>-4</sup> M) in 10% H <sub>2</sub> O:MeCN.                                                                                                                                                                                                                                                                                       | 29 |
| <b>Figure S40.</b> UV-Vis spectral response of <b>3</b> (8 μM) upon incremental addition of CN <sup>-</sup> ions (0-4.33 × 10 <sup>-4</sup> M) in 10% H <sub>2</sub> O:MeCN.                                                                                                                                                                                                                                                                                       | 30 |
| <b>Figure S41.</b> Absorbance of NiTPP-MN ( <b>1</b> ), normalized between the minimum absorbance was found at zero equiv of CN <sup>-</sup> and the maximum absorbance (a) in toluene and (b) in 10% H <sub>2</sub> O:CH <sub>3</sub> CN.                                                                                                                                                                                                                         | 30 |
| <b>Table S1</b> Optical absorption spectral data of synthesized porphyrins in CH <sub>2</sub> Cl <sub>2</sub> at 298 K.                                                                                                                                                                                                                                                                                                                                            | 9  |
| <b>Table S2.</b> Crystal data of NiTPP-MN ( <b>1</b> ).                                                                                                                                                                                                                                                                                                                                                                                                            | 11 |
| <b>Table S3.</b> Deviation of β-pyrrole carbons (Å) and 24 core atoms from porphyrin mean plane (Å) and torsion angle (°) between β-pyrrole ring of porphyrin and dicyanovinyl substituent.                                                                                                                                                                                                                                                                        | 28 |
| <b>Table S4.</b> Detection limits in toluene and 10% H <sub>2</sub> O-CH <sub>3</sub> CN at 298 K.                                                                                                                                                                                                                                                                                                                                                                 | 30 |

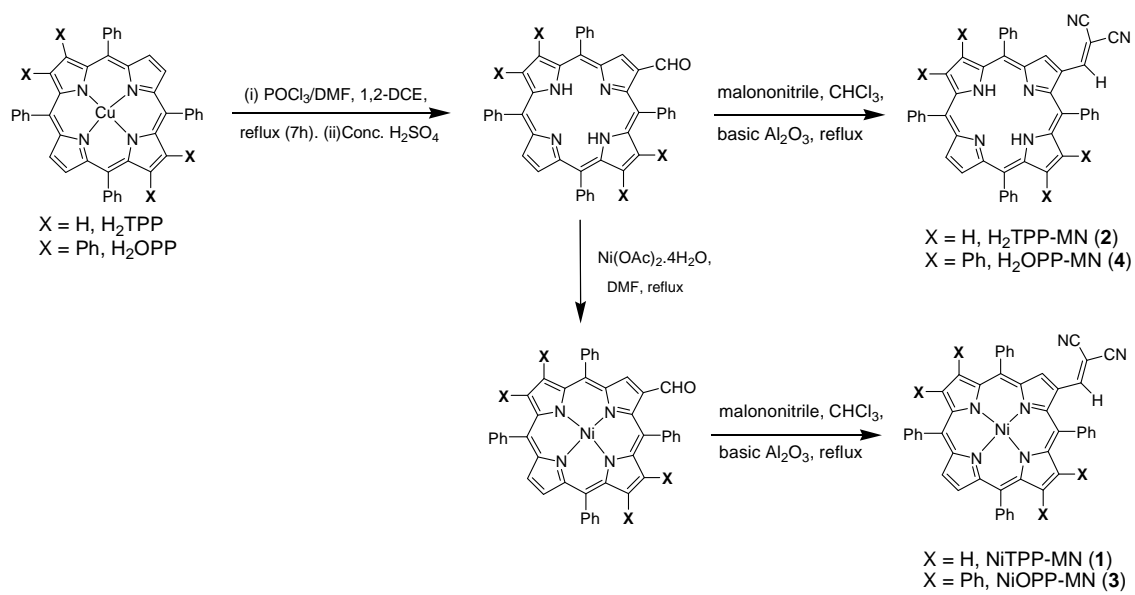

**Scheme S1.** Synthetic route to dicyanovinyl appended  $\beta$ -substituted porphyrins (**1-4**).

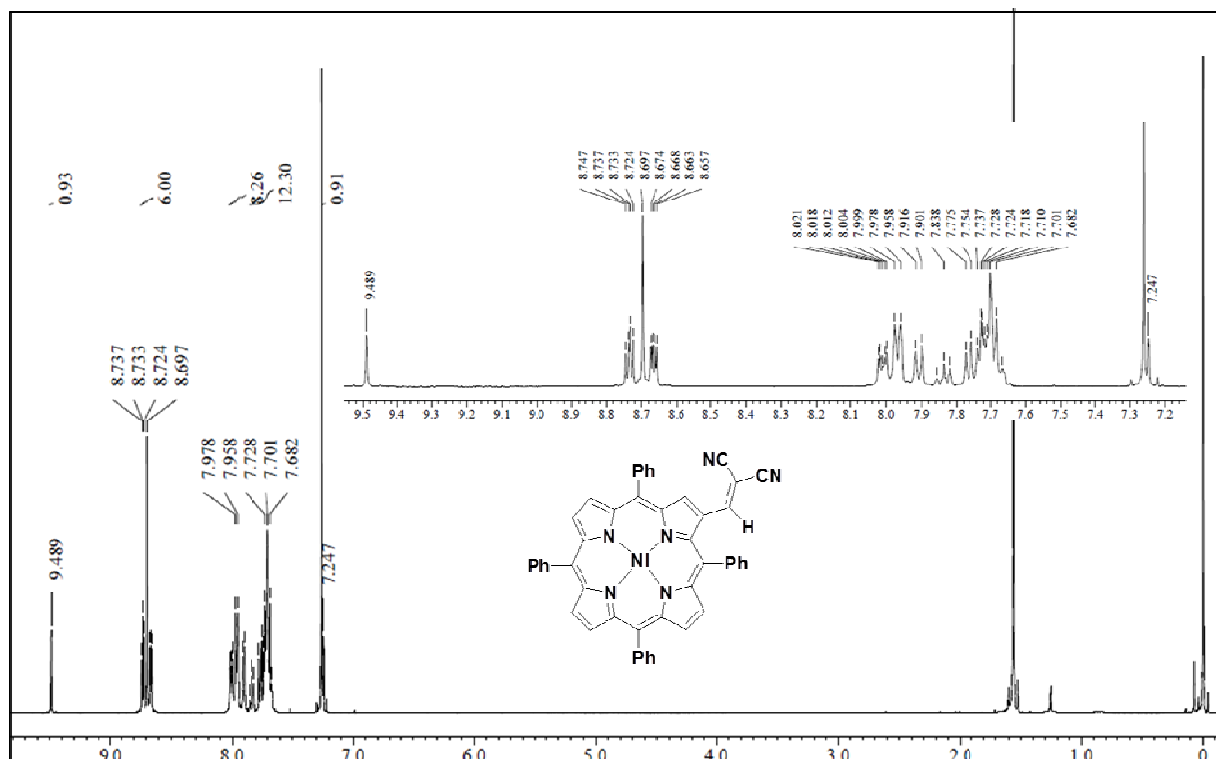

**Figure S1.** <sup>1</sup>H NMR spectrum of NiTPP-MN (1).

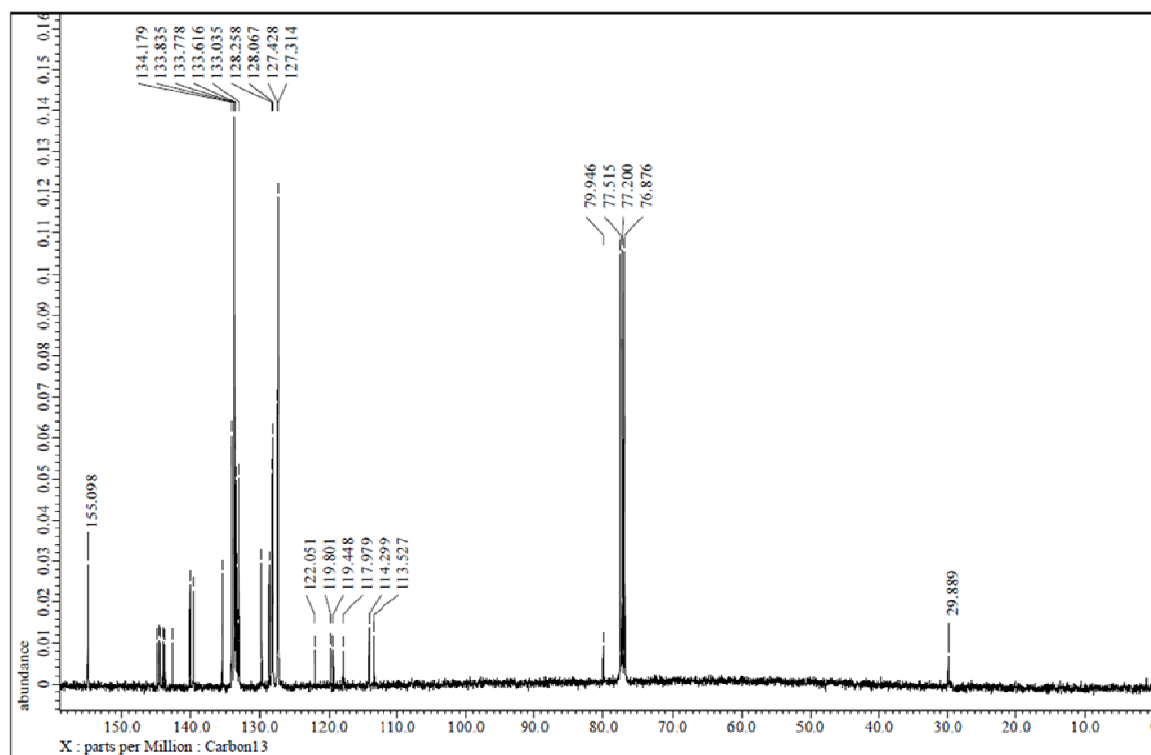

**Figure S2.** <sup>13</sup>C NMR spectrum of NiTPP-MN (1).

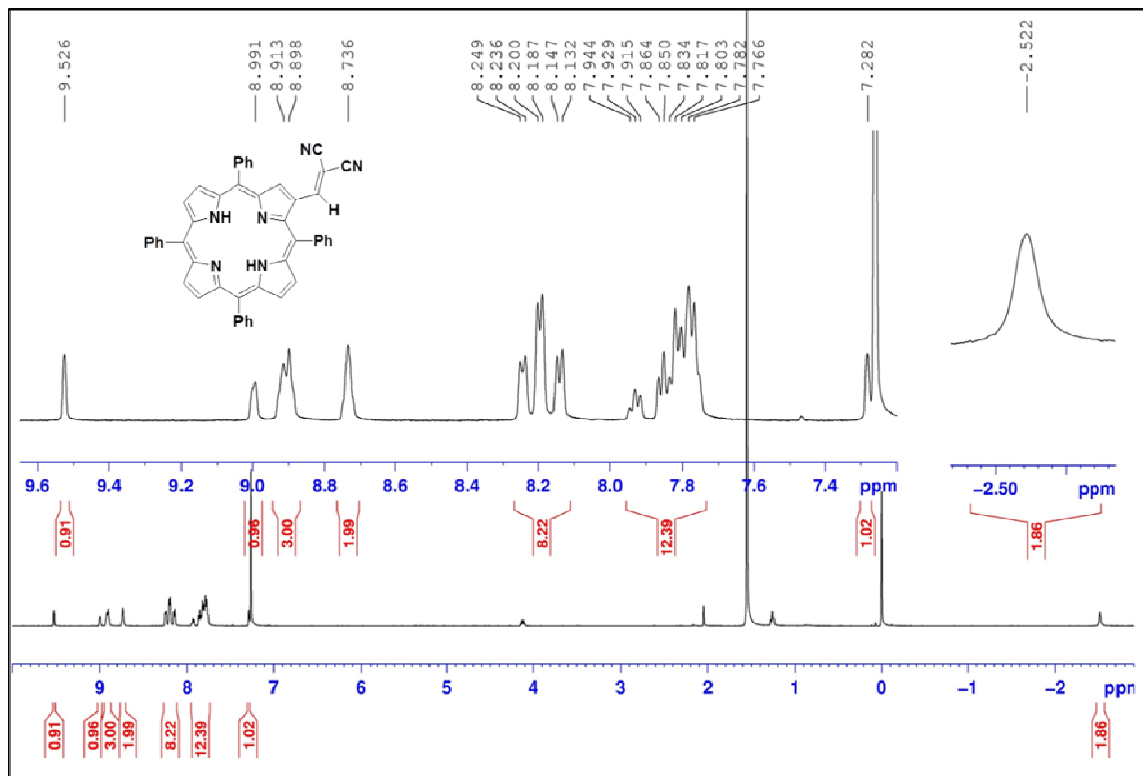

Figure S3.  $^1H$  NMR spectrum of  $H_2TPP-MN$  (2).

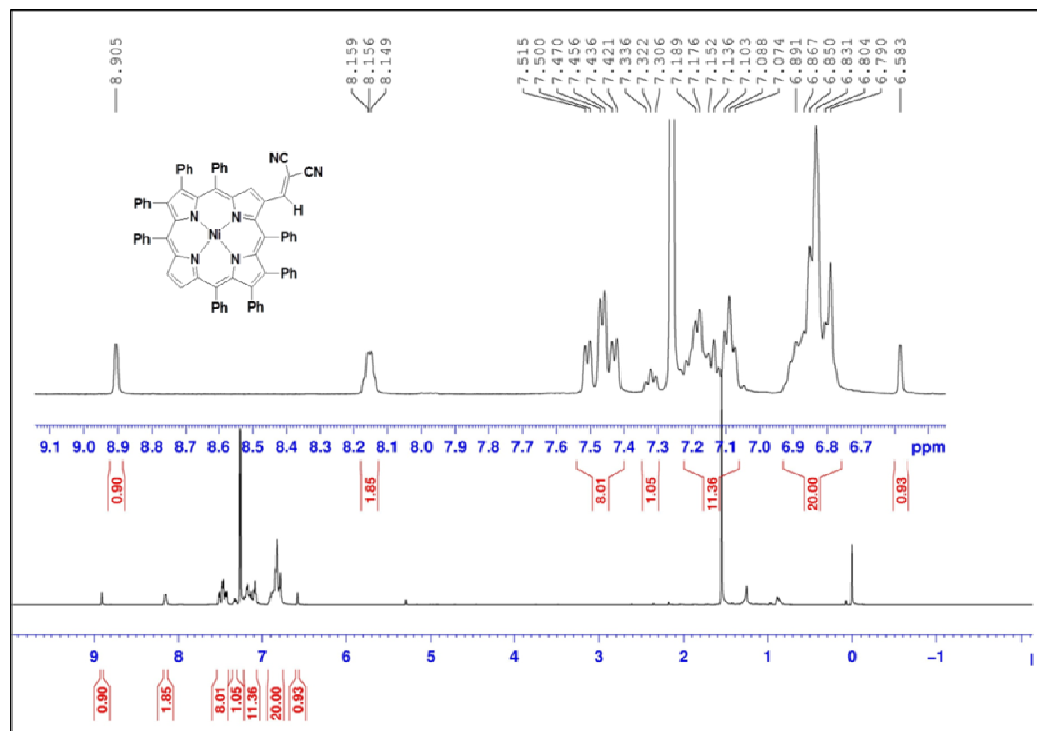

Figure S4.  $^1H$  NMR spectrum of  $NiOPP-MN$  (3).

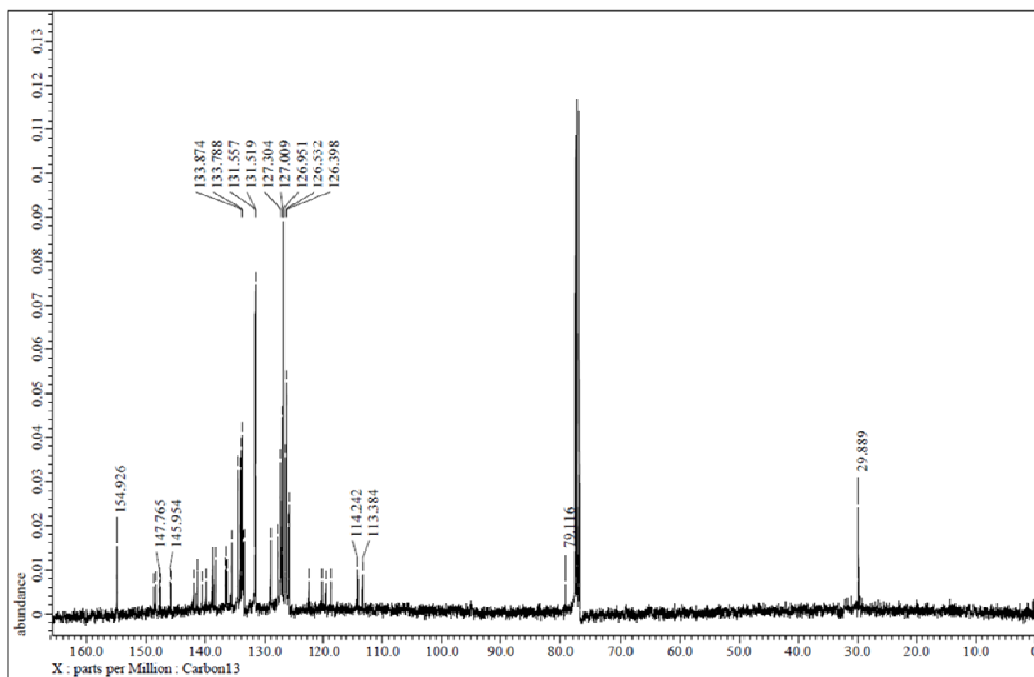

Figure S5.  $^{13}\text{C}$  NMR spectrum of NiOPP-MN (3).

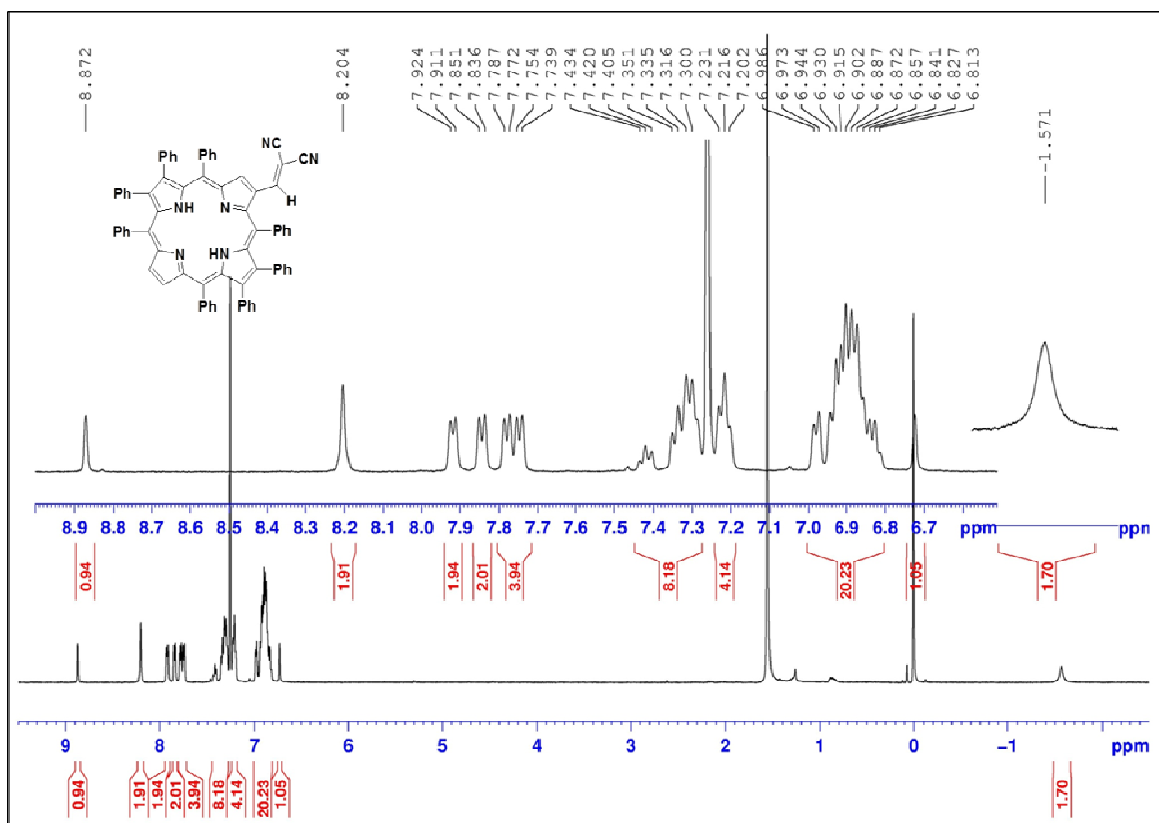

Figure S6.  $^1\text{H}$  NMR spectrum of  $\text{H}_2\text{OPP-MN}$  (4).

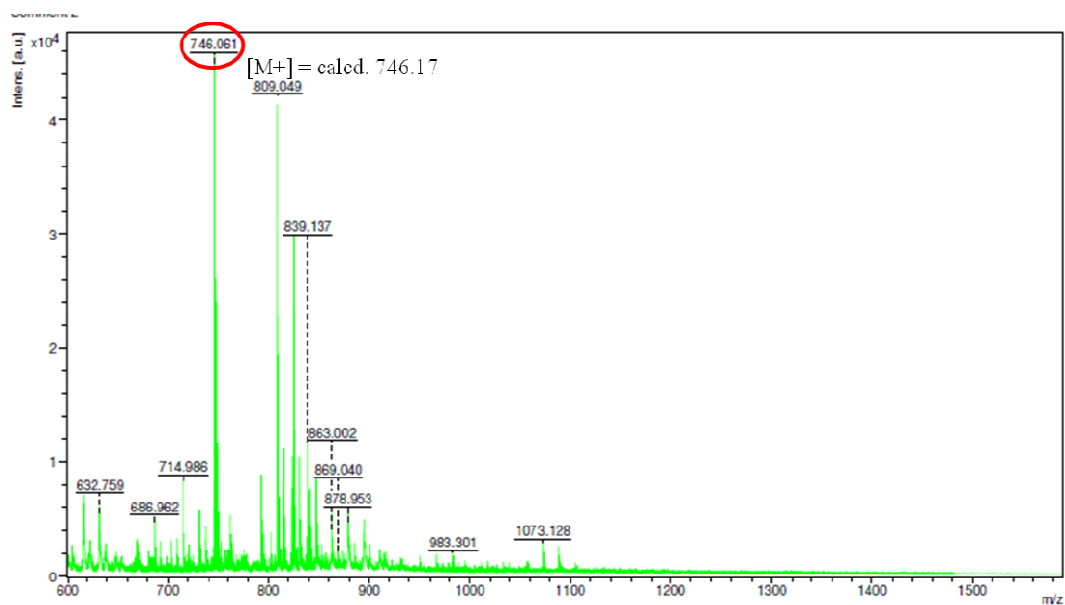

**Figure S7.** MALDI-TOF mass spectrum of NiTPP-MN (1).

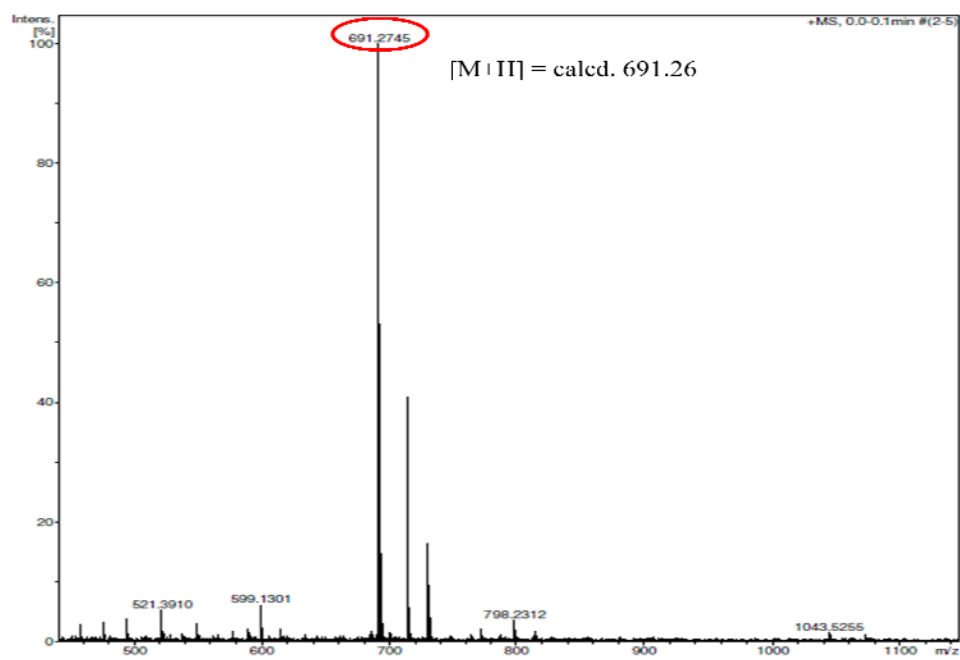

**Figure S8.** ESI mass spectrum of H<sub>2</sub>TPP-MN (2).

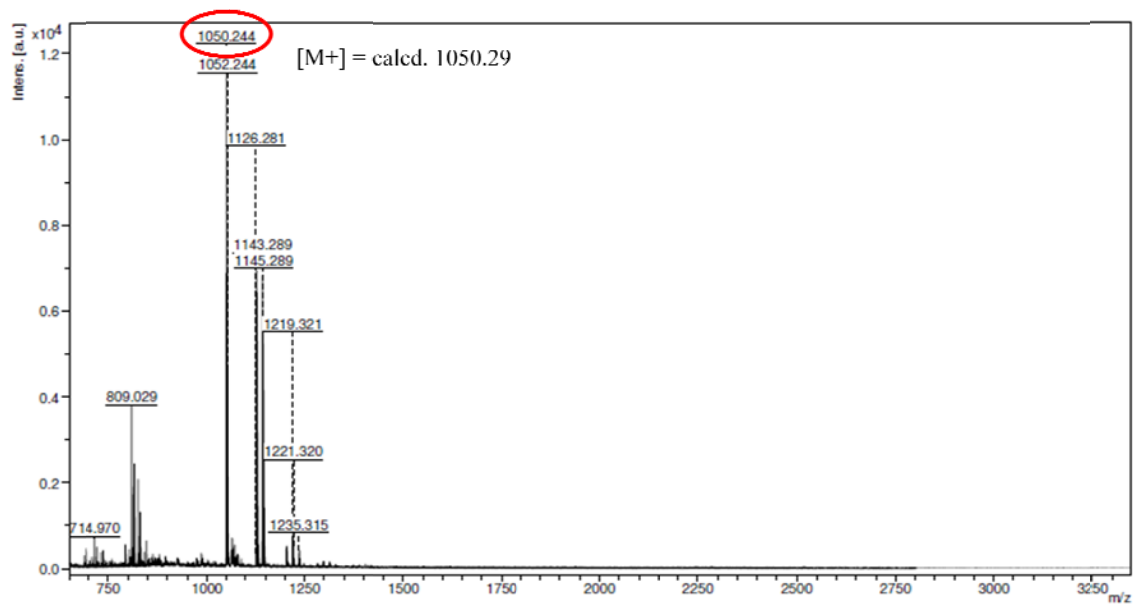

Figure S9. MALDI-TOF mass spectrum of NiOPP-MN (3).

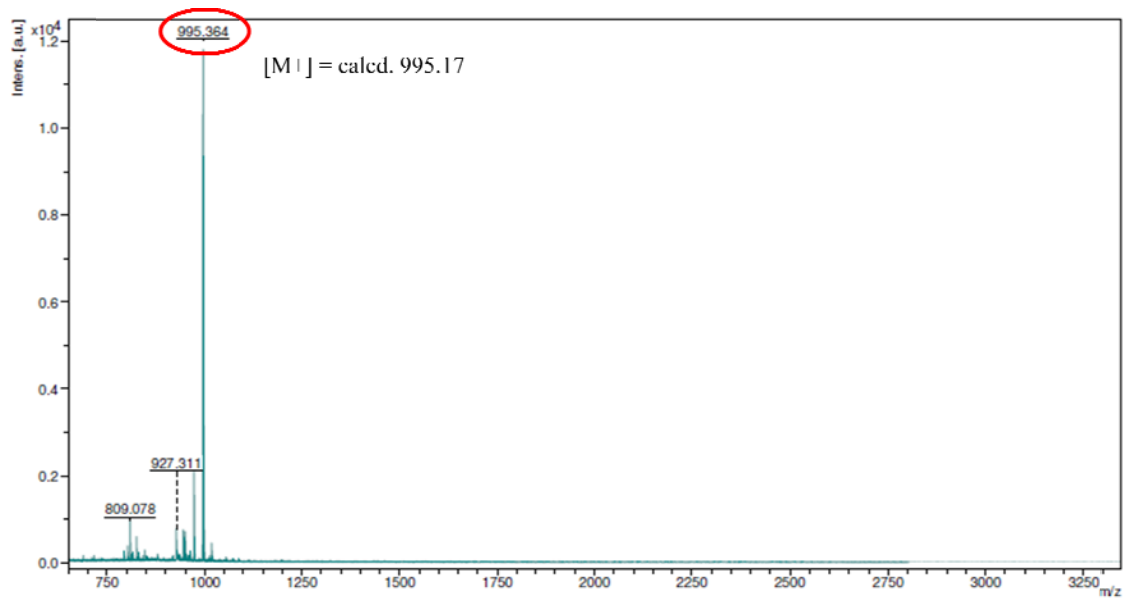

Figure S10. MALDI-TOF mass spectrum of H<sub>2</sub>OPP-MN (4).



**Table S1.** Optical absorption spectral data of synthesized porphyrins in CH<sub>2</sub>Cl<sub>2</sub> at 298 K.

| <b>Porphyrin</b>       | <b>B band(s), nm</b> | <b>Q band(s), nm</b>                       |
|------------------------|----------------------|--------------------------------------------|
| H <sub>2</sub> TPP-CHO | 430(5.41)            | 525(4.16), 567(3.75), 604(3.64), 662(3.76) |
| NiTPP-CHO              | 427(5.32)            | 539(4.13), 580(4.01)                       |
| H <sub>2</sub> OPP-CHO | 450(4.40)            | 547(4.18), 594(4.01), 690(3.82)            |
| NiOPP-CHO              | 444(5.28)            | 560(4.21), 605(3.97)                       |
| H <sub>2</sub> TPP-MN  | 401(4.92), 453(5.24) | 532(4.31), 580(3.97), 615(3.90), 675(3.98) |
| NiTPP-MN               | 385(4.82), 451(5.18) | 550(4.07), 606(4.36)                       |
| H <sub>2</sub> OPP-MN  | 469(5.20)            | 558(4.22), 608(3.99), 699(3.91)            |
| NiOPP-MN               | 401(4.79), 465(5.20) | 569(4.23), 627(4.32)                       |

Values in parentheses refer to  $\log \epsilon$  ( $\epsilon$  in  $\text{Mol}^{-1} \text{cm}^{-1}$ )

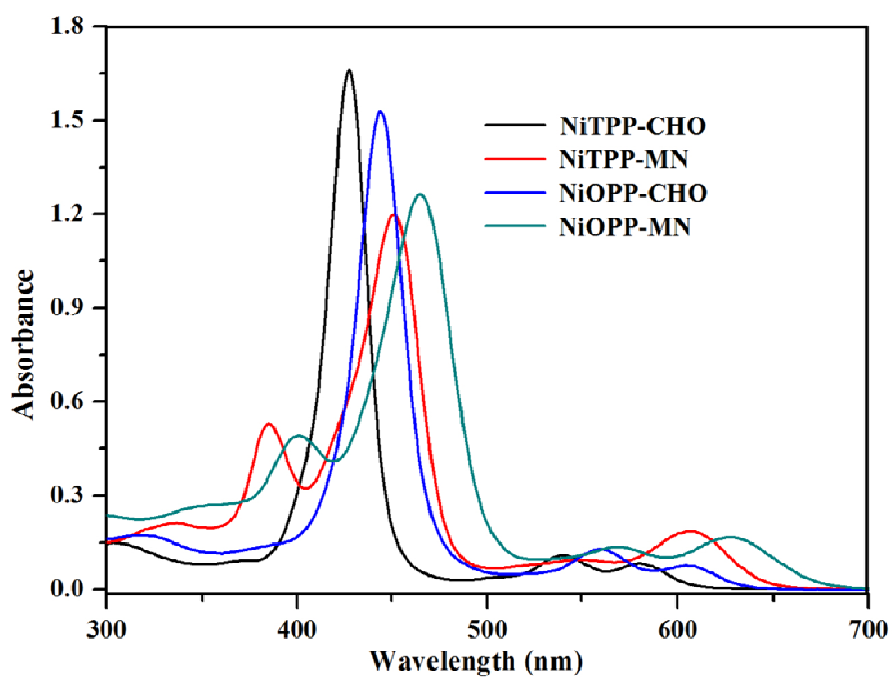

**Figure S11.** UV-Vis spectra of NiTPP-X (X = CHO, MN) derivatives in CH<sub>2</sub>Cl<sub>2</sub> at 298 K.

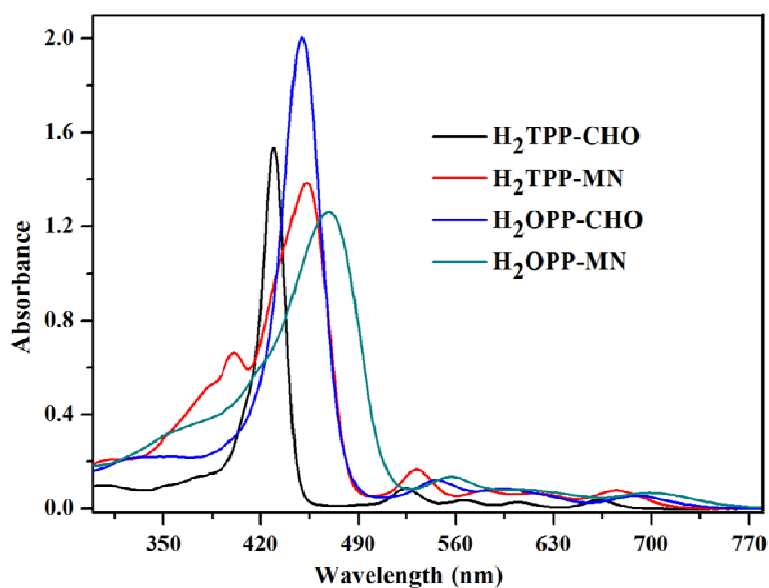

**Figure S12.** UV-Vis spectra of  $H_2TPP-X$  ( $X = CHO, MN$ ) derivatives in  $CH_2Cl_2$  at 298 K.

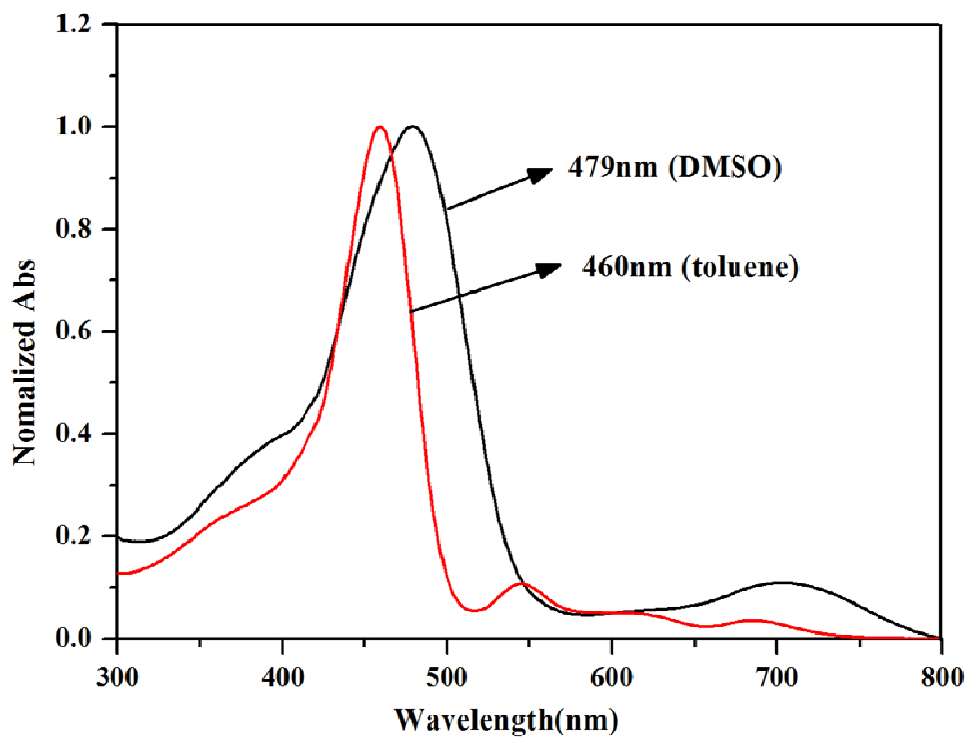

**Figure S13.** UV-Vis spectra of  $H_2OPP-MN$  (**4**) in toluene and DMSO (supports the nonplanar conformation as compared to  $H_2TPP-MN$ ).

| <b>Table S2.</b> Crystal data of NiTPP-MN ( <b>1</b> ) |                                                   |
|--------------------------------------------------------|---------------------------------------------------|
| Empirical formula                                      | C <sub>48</sub> H <sub>28</sub> N <sub>6</sub> Ni |
| Formula Weight                                         | 747.45                                            |
| Crystal system                                         | triclinic                                         |
| Space group                                            | P $\bar{1}$                                       |
| a (Å)                                                  | 11.701(5)                                         |
| b (Å)                                                  | 13.019(5)                                         |
| c (Å)                                                  | 13.324(5)                                         |
| $\alpha$ (°)                                           | 75.1                                              |
| $\beta$ (°)                                            | 69.33                                             |
| $\gamma$ (°)                                           | 85.16                                             |
| Volume (Å <sup>3</sup> )                               | 1835.3(13)                                        |
| Z                                                      | 2                                                 |
| D <sub>calc</sub> (mg/m <sup>3</sup> )                 | 1.353                                             |
| Wavelength                                             | 0.71073                                           |
| Temperature (K)                                        | 293 K                                             |
| No. of total reflections                               | 8893                                              |
| No. of independent reflections                         | 4287                                              |
| R <sup>a</sup>                                         | 0.0515                                            |
| R <sub>w</sub> <sup>b</sup>                            | 0.1669                                            |
| CCDC                                                   | 1401278                                           |

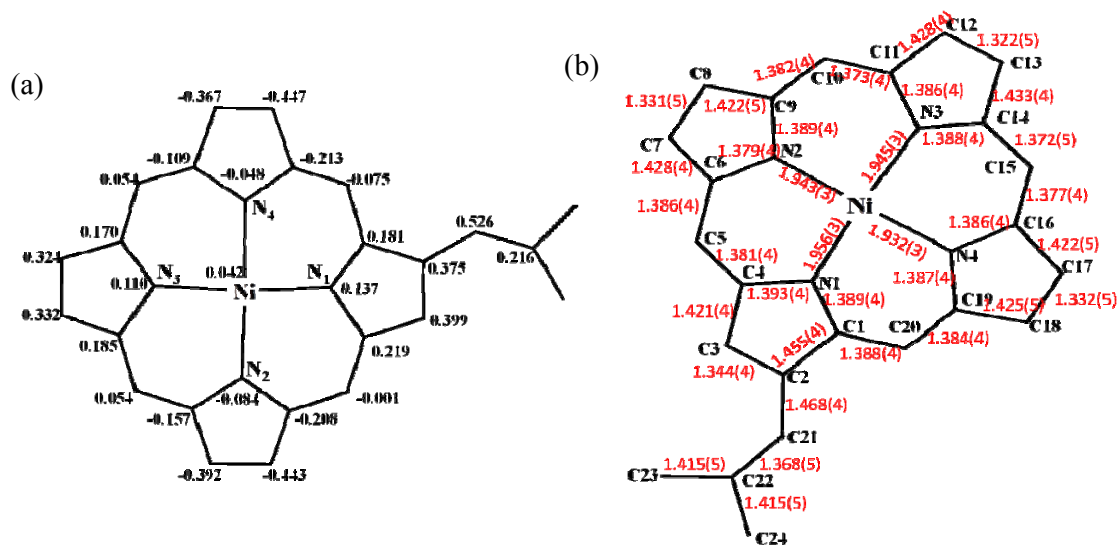

$$\Delta C_{\beta} = 0.38 \text{ \AA}, \Delta_{24} = 0.21 \text{ \AA}$$

$$\text{Torsion angle (C3-C2-C21-C22)} = 26.39^{\circ}$$

**Figure S14.** (a) The displacement of porphyrin-core atoms in Å from the mean plane and (b) bond lengths of **1**.

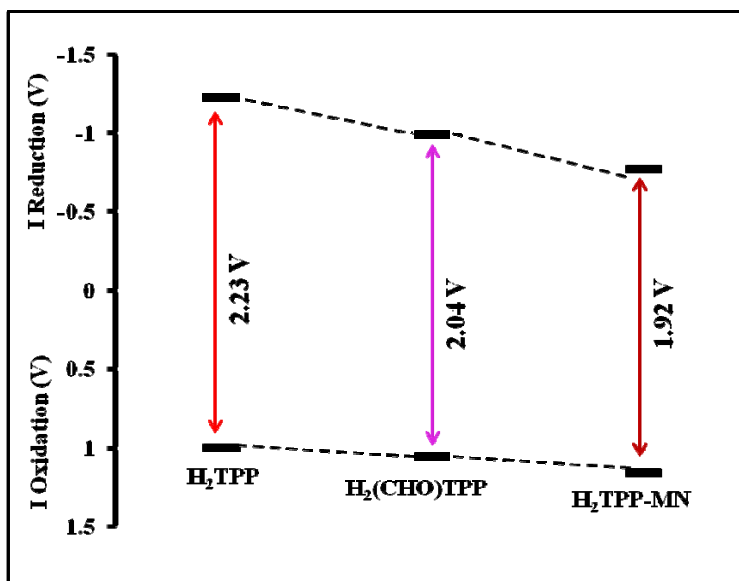

(a) Free-base TPP-system

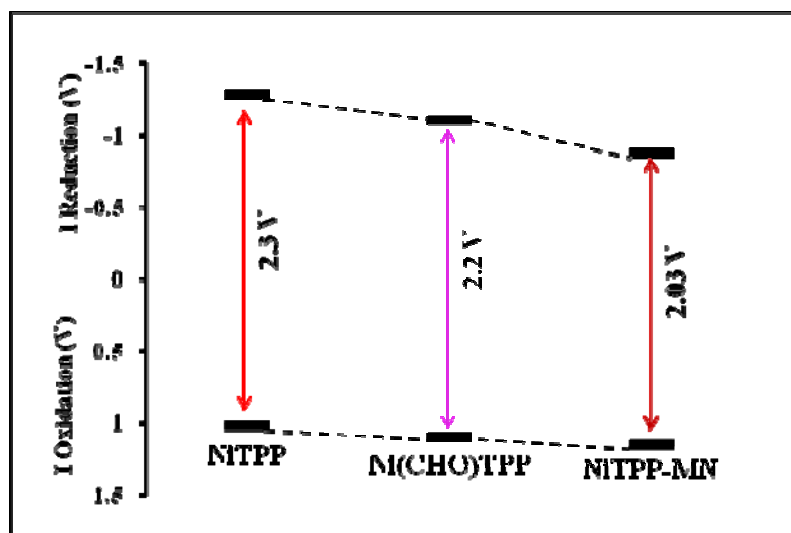

(b) Ni-metallated TPP-system

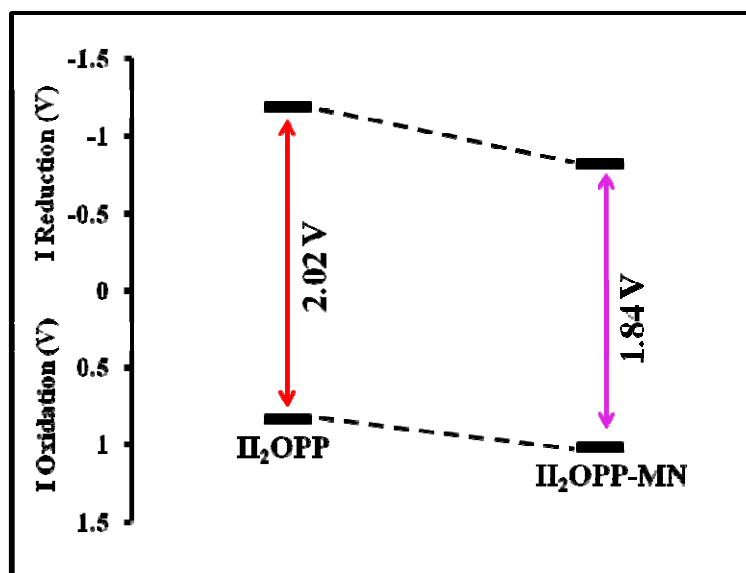

(c) Free-base OPP-system

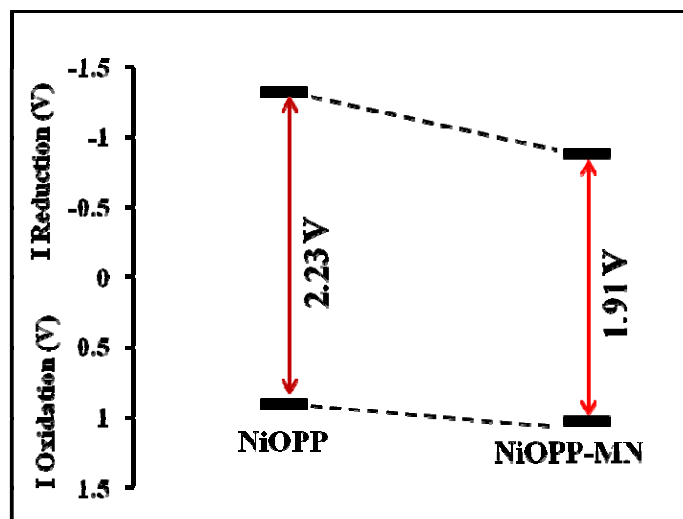

(d) Ni-metallated OPP-system

**Figure S15.** The HOMO-LUMO variation of various dicyanovinyl appended  $\beta$ -substituted porphyrins: (a) free-base TPP-system (b) Ni-metallated TPP-system (c) free-base OPP-system (d) Ni-metallated OPP-system.

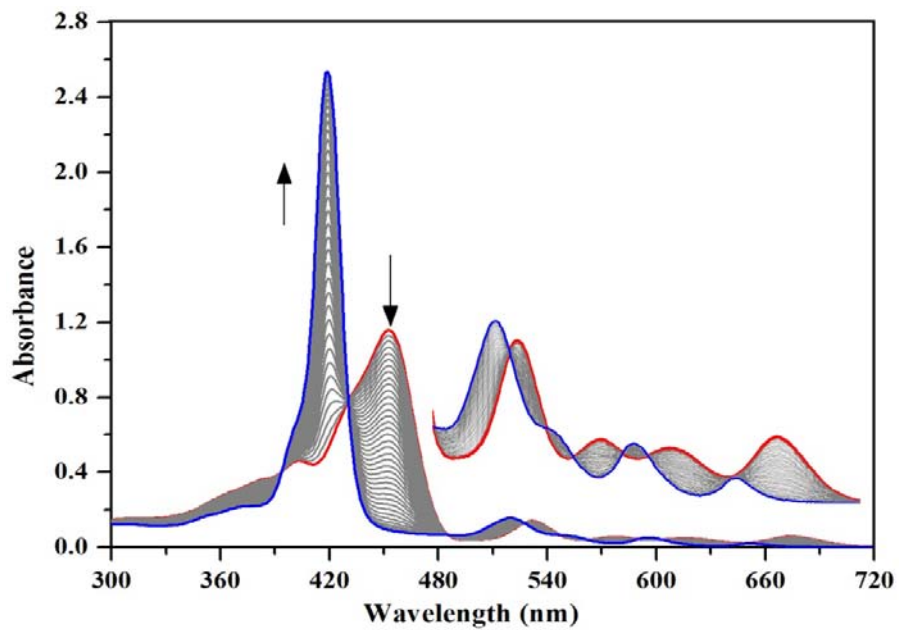

**Figure S16.** UV-Vis spectral response of **2** (8 μM) upon incremental addition of CN<sup>-</sup> ions (1.3 equiv.) in toluene.

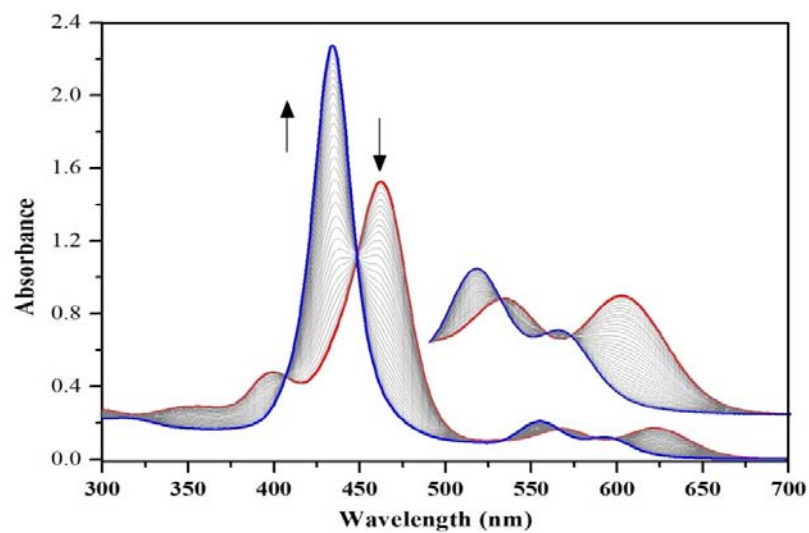

**Figure S17.** UV-Vis spectral response of **3** (8 μM) upon incremental addition of CN<sup>-</sup> ions (2.5 equiv.) in toluene.

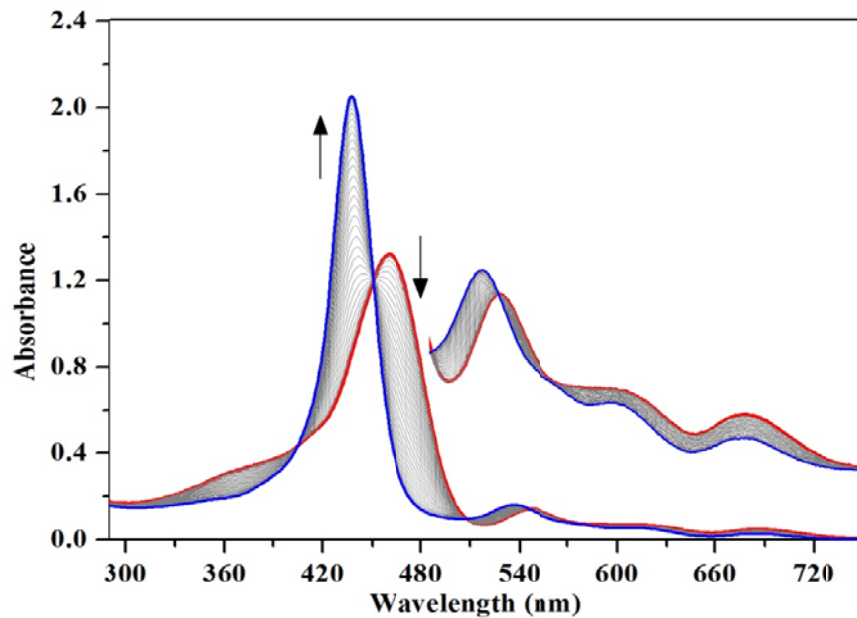

**Figure S18.** UV-Vis spectral response of **4** (8  $\mu\text{M}$ ) upon incremental addition of  $\text{CN}^-$  ions (2.3 equiv.) in toluene.

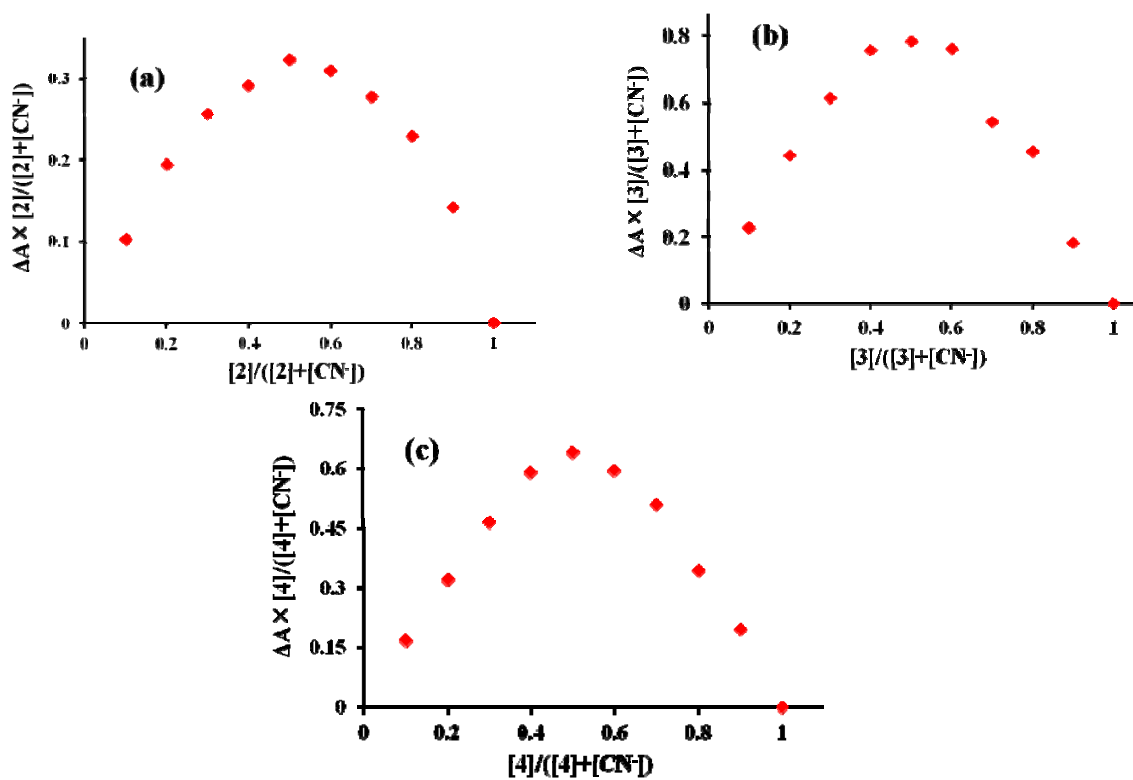

**Figure S19.** Job's plot for the porphyrin chemodosimeters.

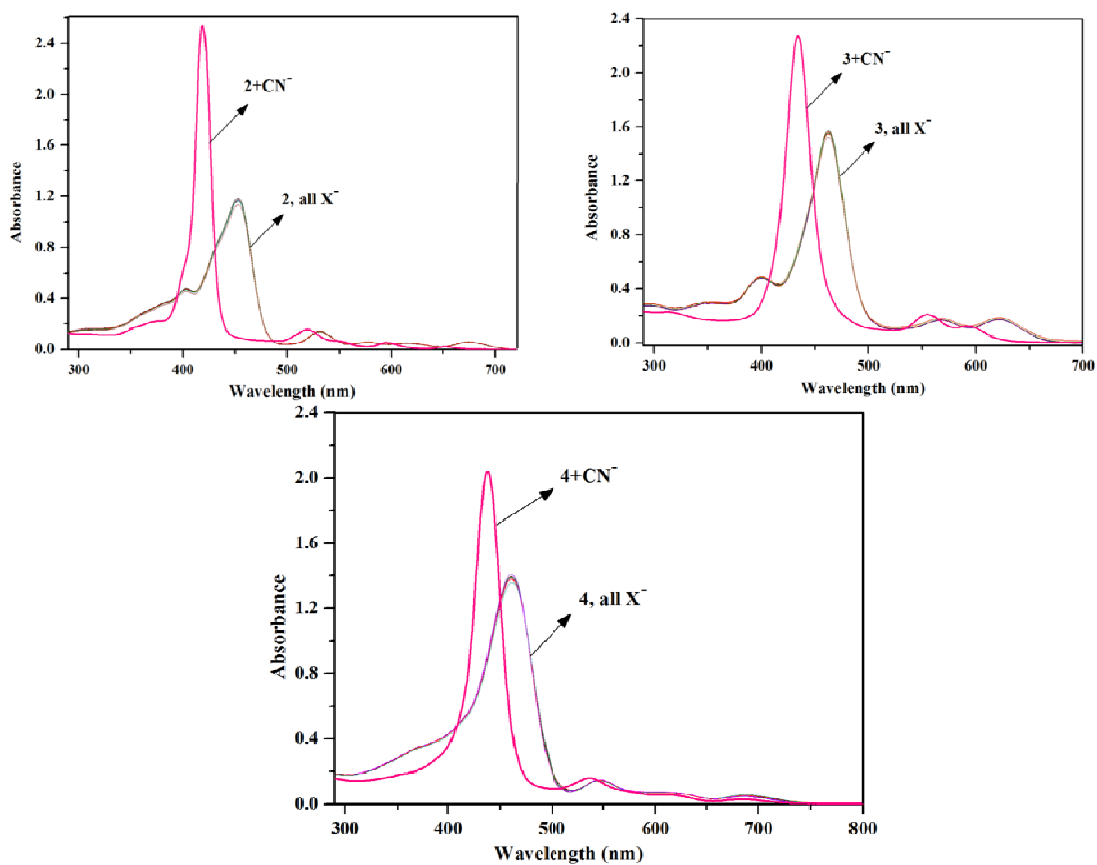

**Figure S20.** UV-Vis spectra of **2**, **3** and **4** in toluene upon addition of various anions.



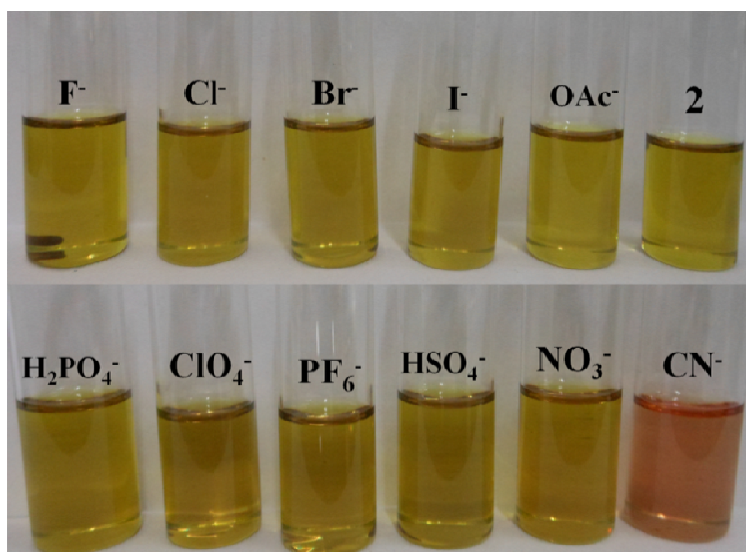

**Figure S21.** Visual-Colorimetric changes by addition of various anions to **2**.

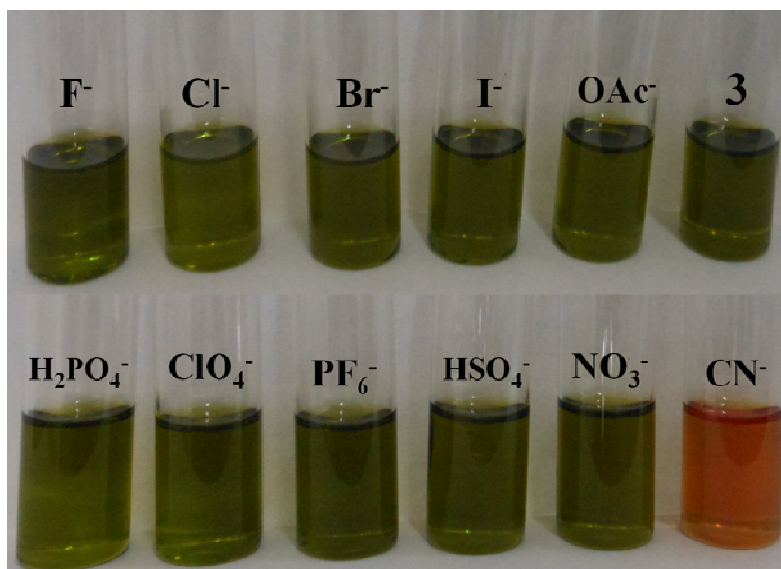

**Figure S22.** Visual-Colorimetric changes by addition of various anions to **3**.

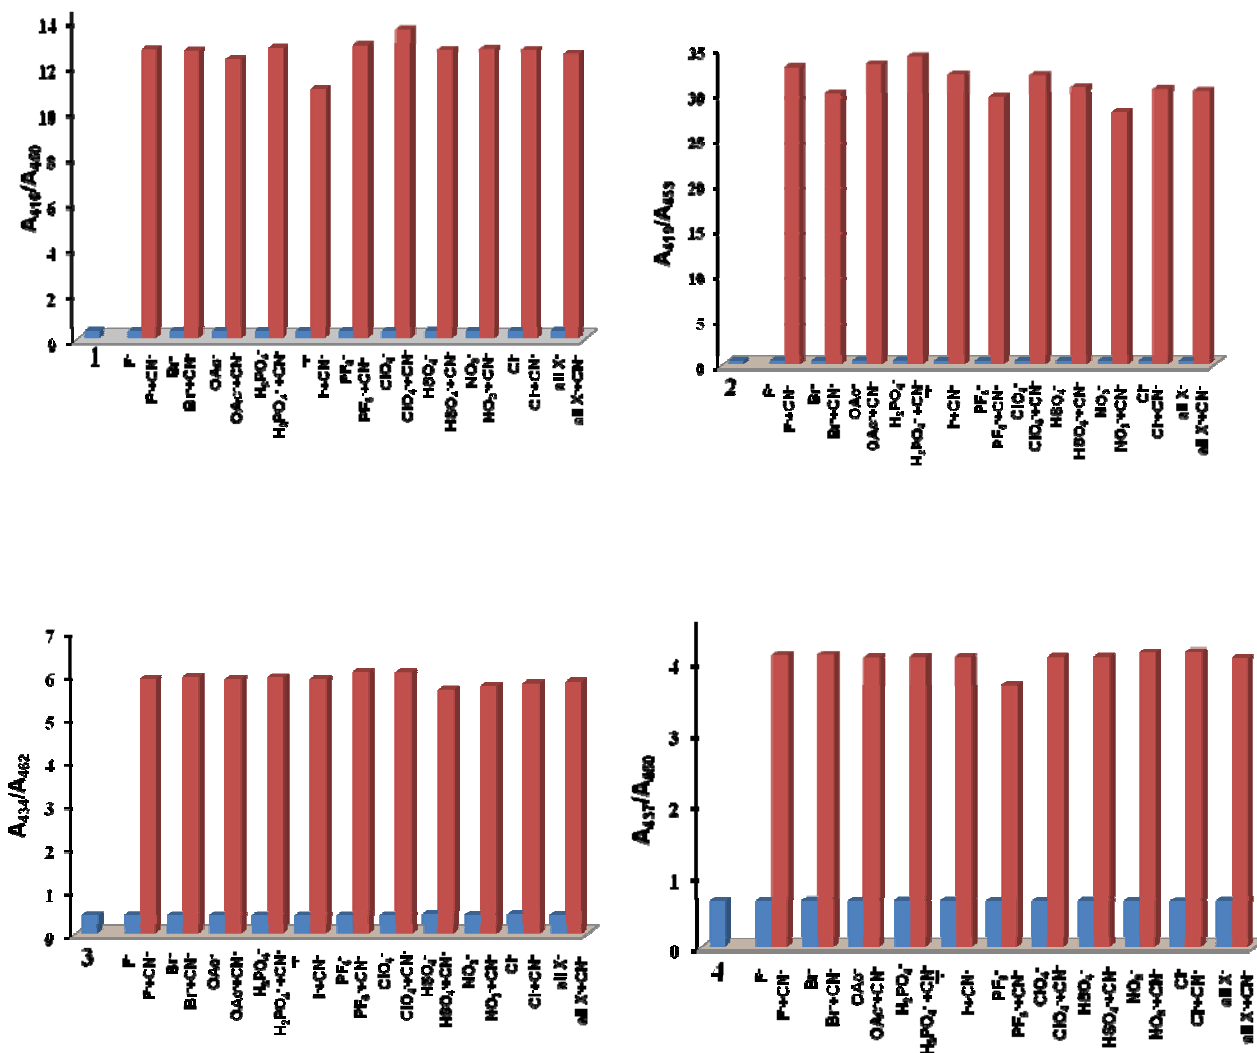

**Figure S23.** Ratiometric absorbance changes of 1( $A_{416}/A_{450}$ ), 2( $A_{419}/A_{453}$ ), 3( $A_{434}/A_{462}$ ) and 4( $A_{437}/A_{460}$ ) upon addition of  $\text{CN}^-$  ions and 10 equiv. of other anions. Blue bars indicate the blank and various anions, and red bars indicate the addition of  $\text{CN}^-$  ions to the interfering anions.

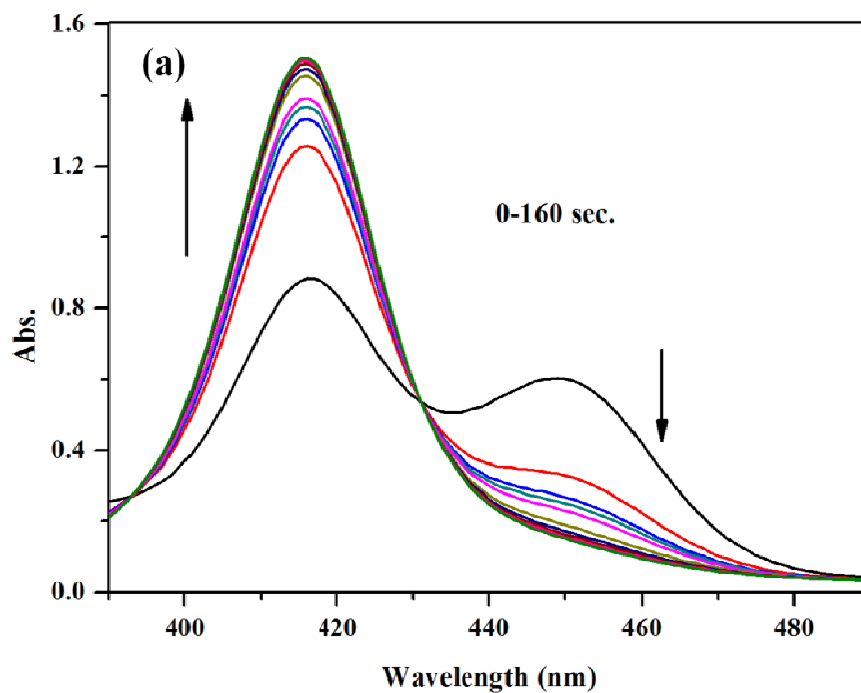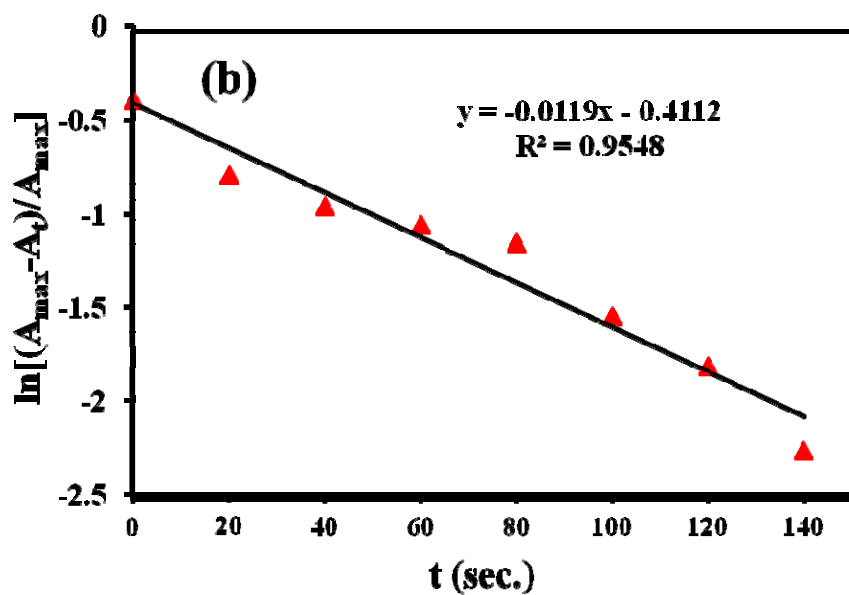

Figure S24. (a) Changes in absorption spectra of 1 incubated with  $\text{CN}^-$  ions for 0–160 seconds. (b) Pseudo-first-order kinetic plot.

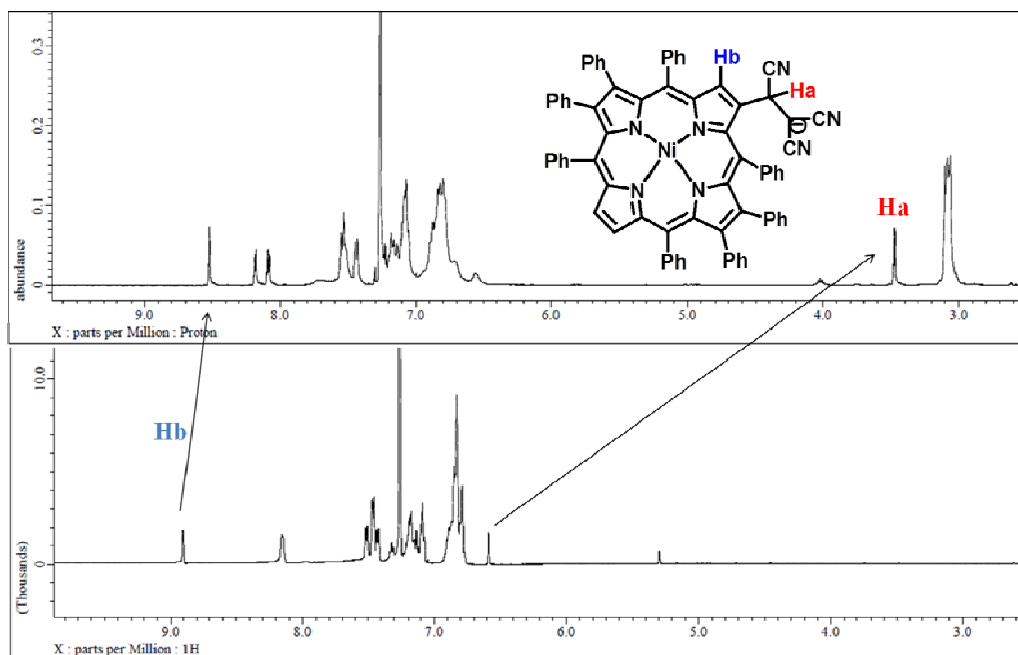

**Figure S25.**  $^1\text{H}$  NMR spectra of the adduct  $[\mathbf{3-CN}]^-$  after addition of  $\text{CN}^-$  ions (1 equiv. ) to NiOPP-MN ( $5 \times 10^{-3}$  M).

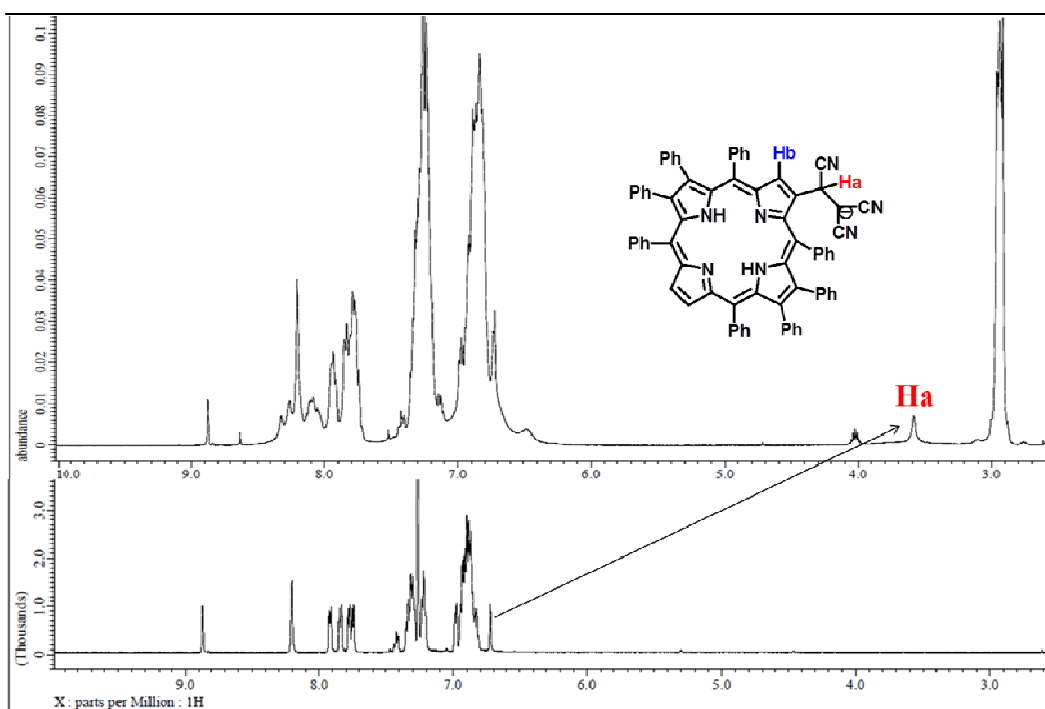

**Figure S26.**  $^1\text{H}$  NMR spectra of the adduct  $[\mathbf{2-CN}]^-$  after addition of  $\text{CN}^-$  ions (1 equiv. ) to  $\text{H}_2\text{TPP-MN}$  ( $5 \times 10^{-3}$  M).

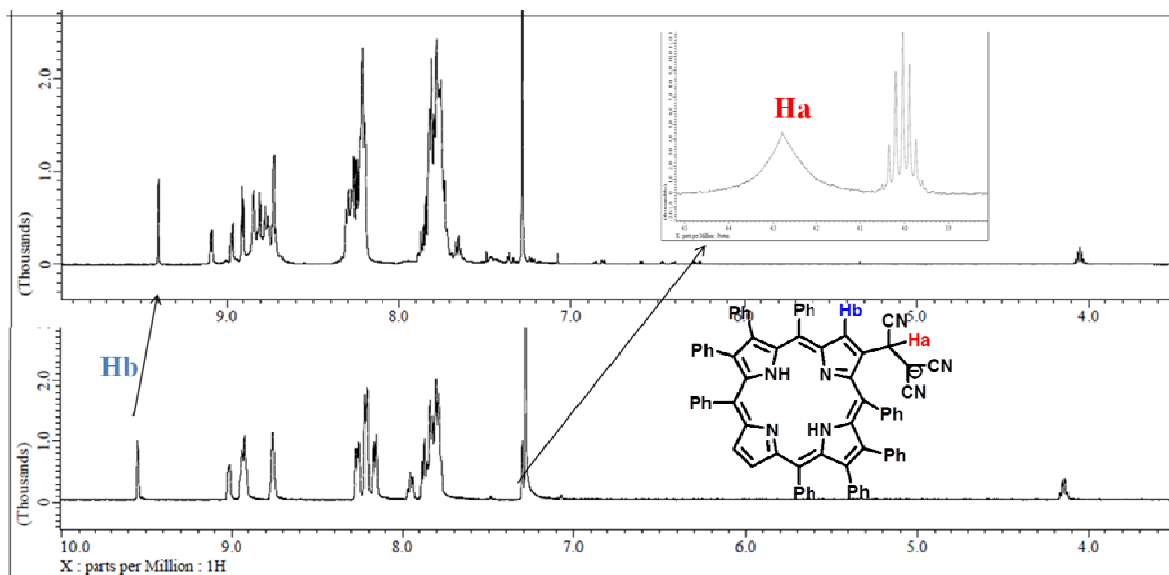

**Figure S27.**  $^1\text{H}$  NMR spectra of the adduct  $[\mathbf{4-CN}]^-$  after addition of  $\text{CN}^-$  ions (1 equiv.) to  $\text{H}_2\text{OPP-MN}$  ( $5 \times 10^{-3}$  M).

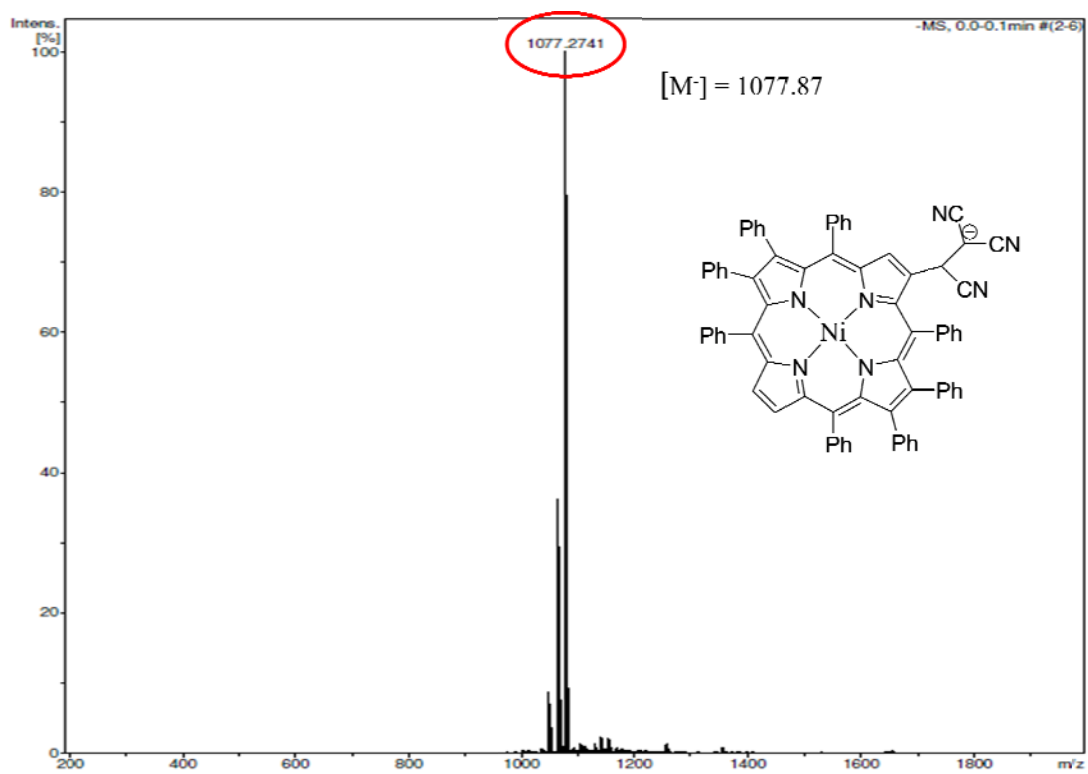

**Figure S28.** ESI-MS spectrum of the adduct  $[\mathbf{3-CN}]^-$  after addition of  $\text{CN}^-$  ions (1 equiv.) to  $\text{NiOPP-MN}$  ( $\mathbf{3}$ ).

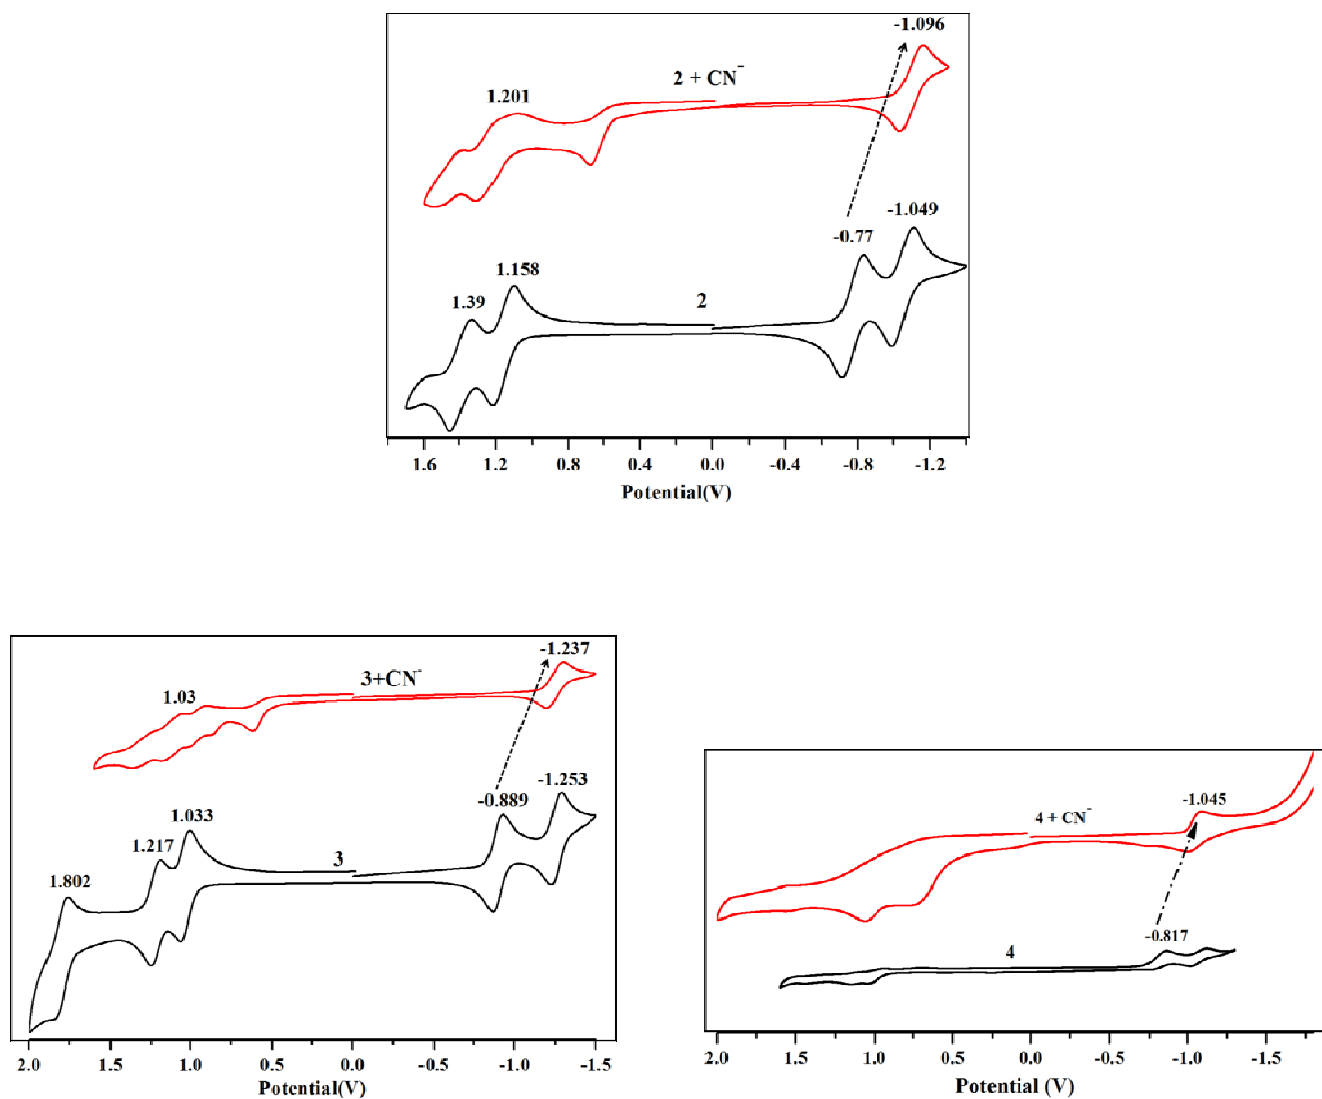

**Figure S29.** Cyclic voltametric studies of **2-4** in absence and presence of  $[\text{CN}^-]$  in  $\text{CH}_2\text{Cl}_2$  containing 0.1 M  $\text{TBAPF}_6$  at 298 K.

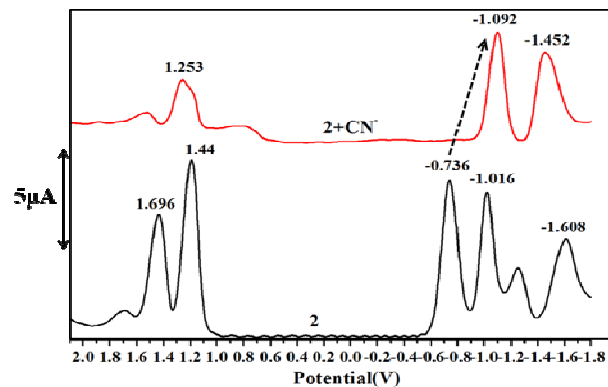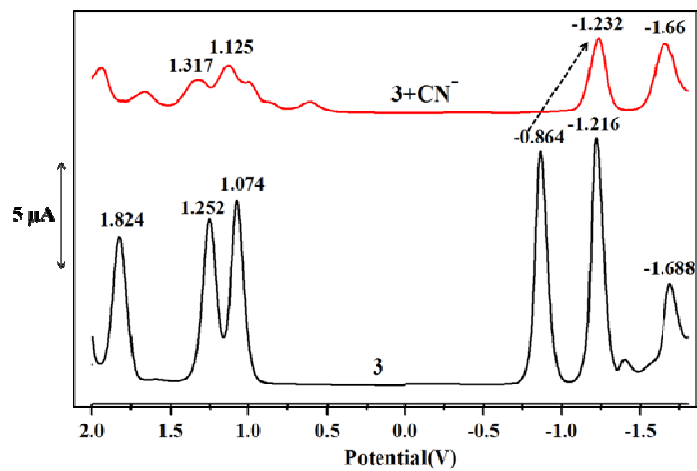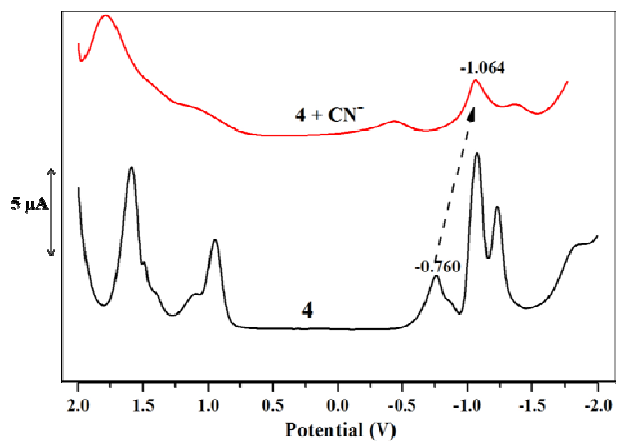

**Figure S30.** DPV traces of 2-4 in absence and presence of  $[\text{CN}^-]$  in  $\text{CH}_2\text{Cl}_2$  containing 0.1 M  $\text{TBAPF}_6$  at 298 K.

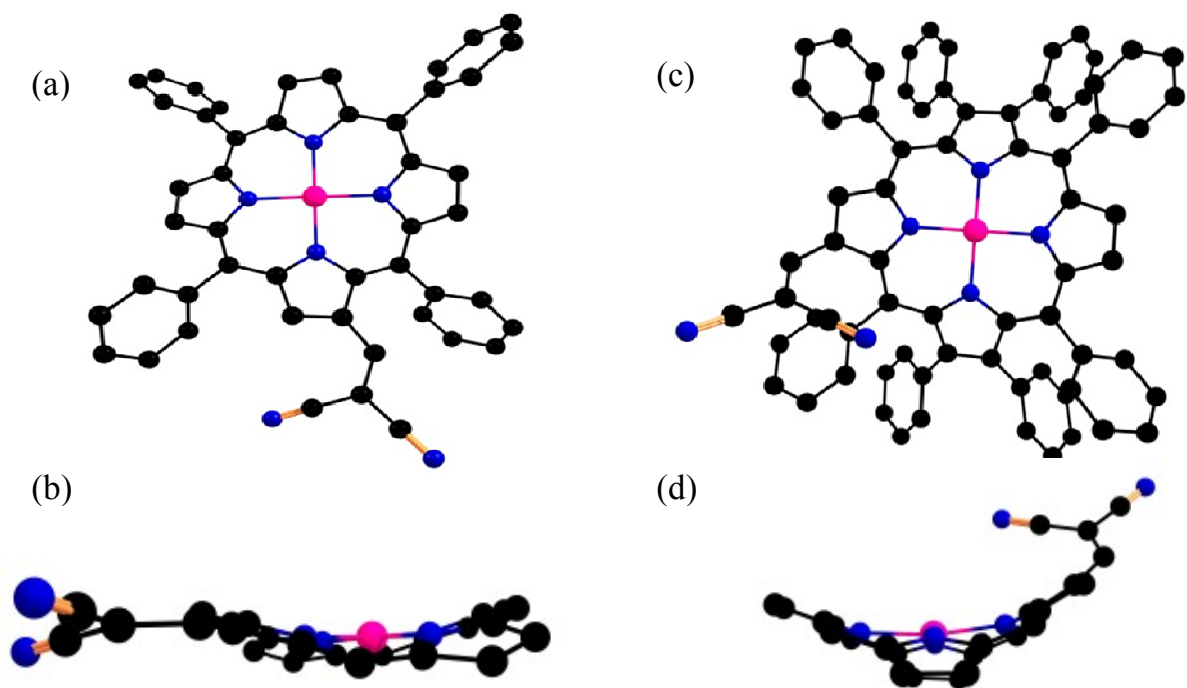

**Figure S31.** Optimized-geometries showing top as well as side views of NiTPP-MN (a and b) and NiOPP-MN (c and d), respectively.

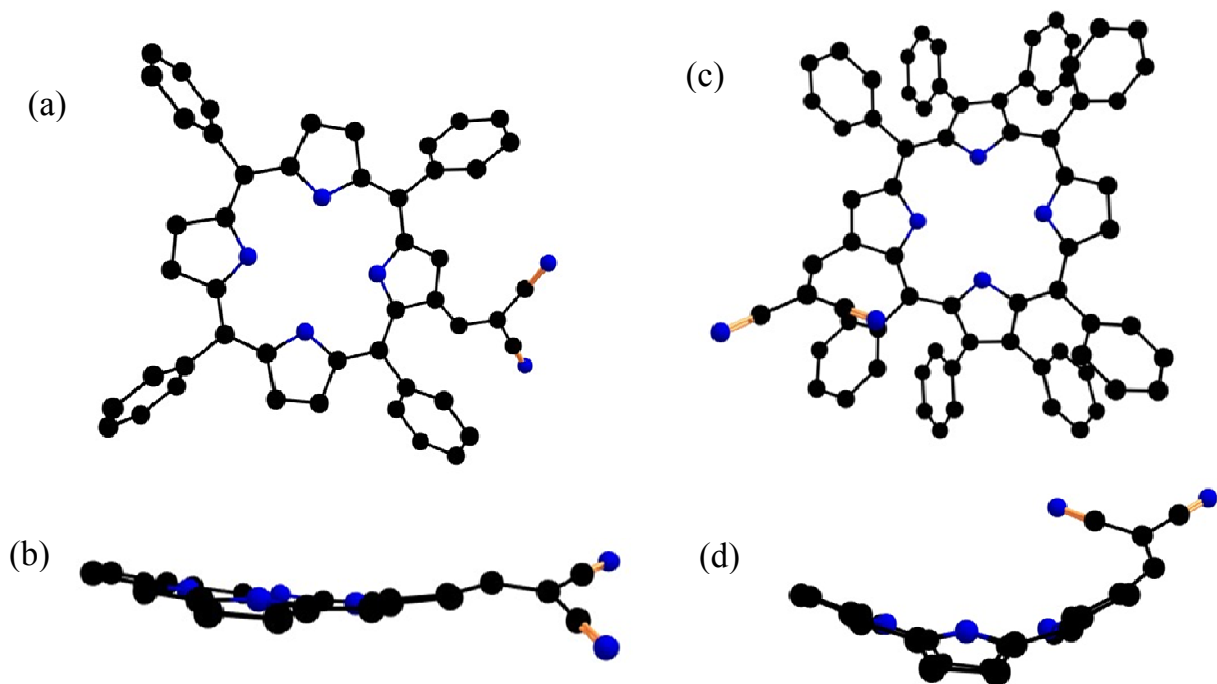

**Figure S32.** Optimized-geometries showing top as well as side views of H<sub>2</sub>TPP-MN (a and b) and H<sub>2</sub>OPP-MN (c and d), respectively.



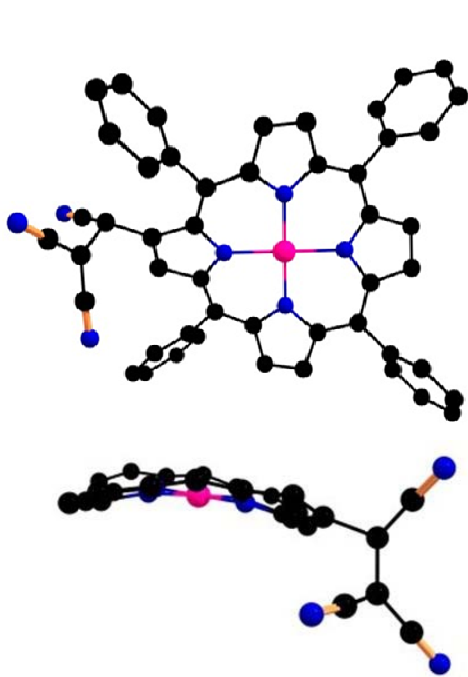

NiTPP-MN(1)-CN<sup>-</sup>

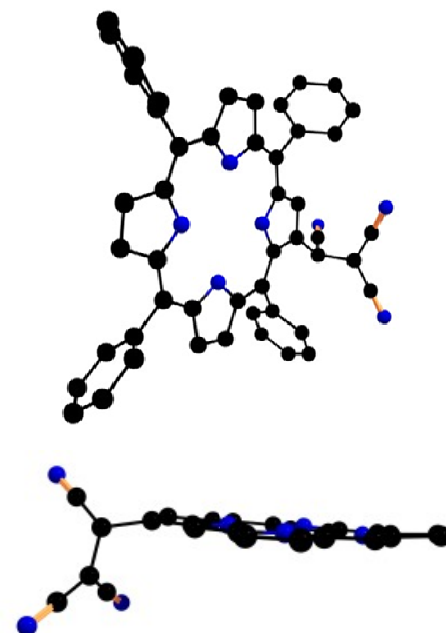

H<sub>2</sub>TPP-MN(2)-CN<sup>-</sup>

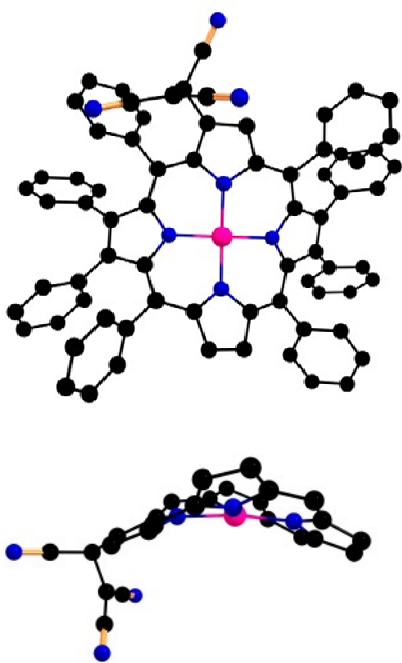

NiOPP-MN(3)-CN<sup>-</sup>

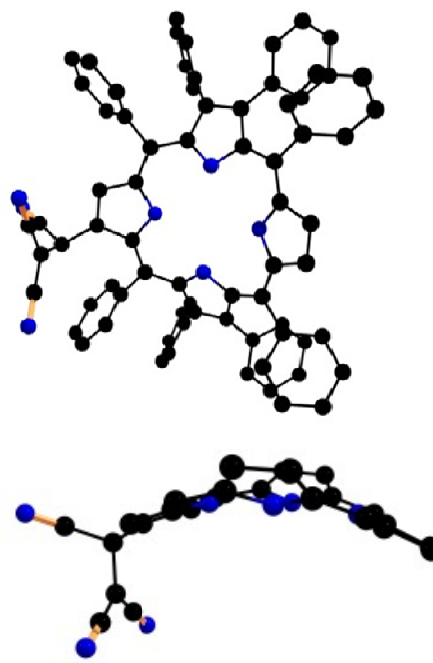

H<sub>2</sub>OPP-MN(4)-CN<sup>-</sup>

Figure S33. Optimized-geometries for 1-CN<sup>-</sup>, 2-CN<sup>-</sup>, 3-CN<sup>-</sup> and 4-CN<sup>-</sup>.

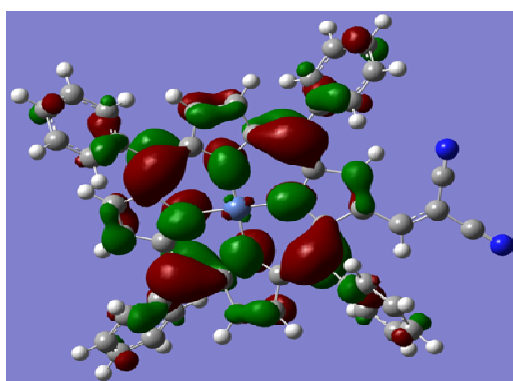

**HOMO**

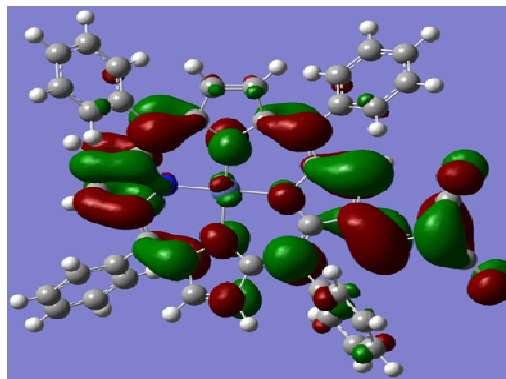

**LUMO**

**Figure S34.** Pictorial representation of frontier orbitals of NiTPP-MN (**1**).

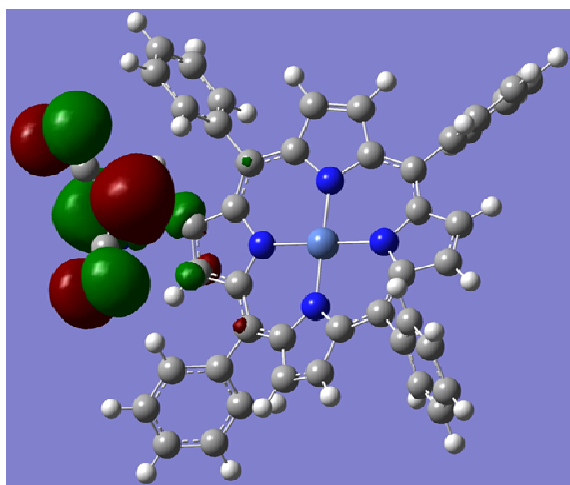

**HOMO**

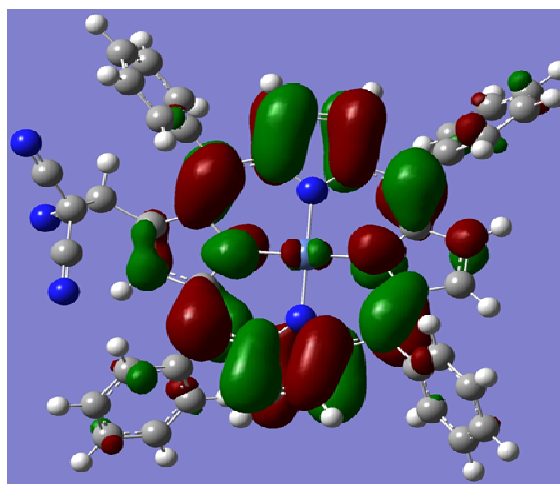

**LUMO**

**Figure S35.** Pictorial representation of frontier orbitals of anionic species formed after the addition of  $\text{CN}^-$  to NiTPP-MN (**1**).

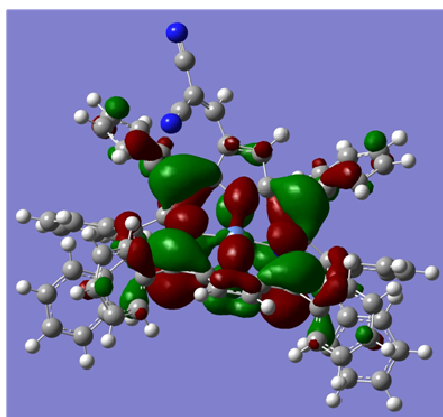

**HOMO**

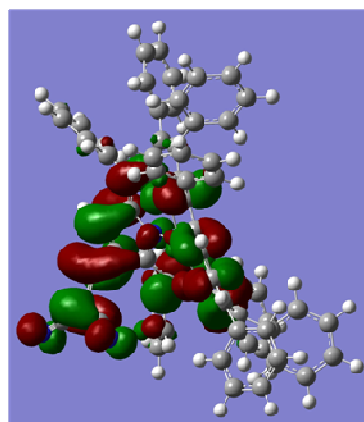

**LUMO**

**Figure S36.** Pictorial representation of frontier orbitals of NiOPP-MN (**3**).

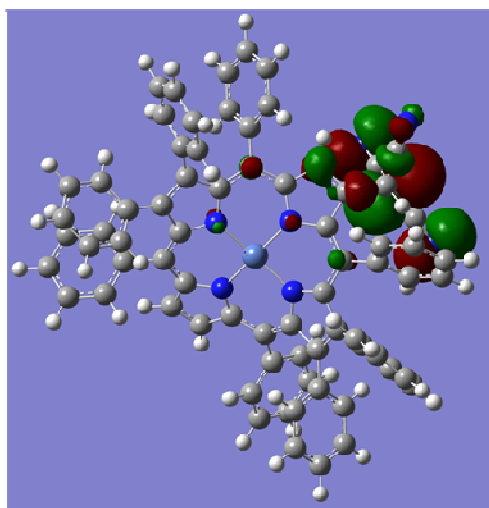

**HOMO**

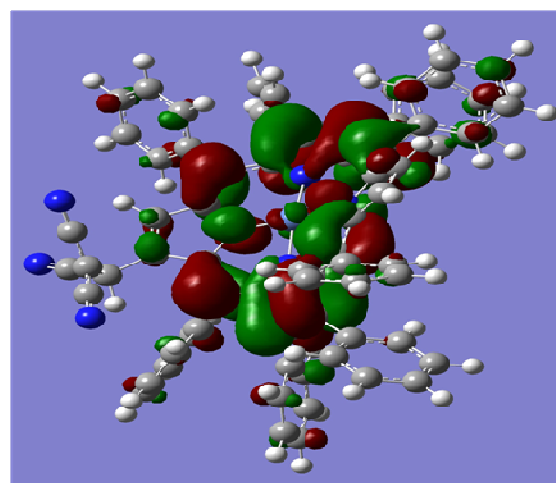

**LUMO**

**Figure S37.** Pictorial representation of frontier orbitals of anionic species formed after the addition of  $\text{CN}^-$  to NiOPP-MN (**3**).

**Table S3.** Deviation of  $\beta$ -pyrrole carbons ( $\text{\AA}$ ) and 24 core atoms from porphyrin mean plane ( $\text{\AA}$ ) and torsion angle ( $^\circ$ ) between  $\beta$ -pyrrole ring of porphyrin and dicyanovinyl substituent.

| <b>Porphyrin</b>                        | <b>Deviation(<math>\text{\AA}</math>)</b>       | <b>Torsion angle (<math>^\circ</math>)</b> |
|-----------------------------------------|-------------------------------------------------|--------------------------------------------|
| NiTPP-MN                                | $\Delta C_\beta = 0.380$<br>$\Delta 24 = 0.308$ | 23.5                                       |
| H <sub>2</sub> TPP-MN                   | $\Delta C_\beta = 0.292$<br>$\Delta 24 = 0.135$ | 27.2                                       |
| NiOPP-MN                                | $\Delta C_\beta = 1.064$<br>$\Delta 24 = 0.54$  | 38.0                                       |
| H <sub>2</sub> OPP-MN                   | $\Delta C_\beta = 0.924$<br>$\Delta 24 = 0.446$ | 43.7                                       |
| NiTPP-MN + CN <sup>-</sup>              | $\Delta C_\beta = 0.224$<br>$\Delta 24 = 0.277$ | 77.5                                       |
| H <sub>2</sub> TPP-MN + CN <sup>-</sup> | $\Delta C_\beta = 0.101$<br>$\Delta 24 = 0.052$ | 79.1                                       |
| NiOPP-MN + CN <sup>-</sup>              | $\Delta C_\beta = 0.938$<br>$\Delta 24 = 0.54$  | 81.1                                       |
| H <sub>2</sub> OPP-MN + CN <sup>-</sup> | $\Delta C_\beta = 0.892$<br>$\Delta 24 = 0.427$ | 91.7                                       |

$\Delta C_\beta$  refers mean plane deviation of  $\beta$ -carbon atoms,  $\Delta 24$  refers mean plane deviation of 24 core atoms.

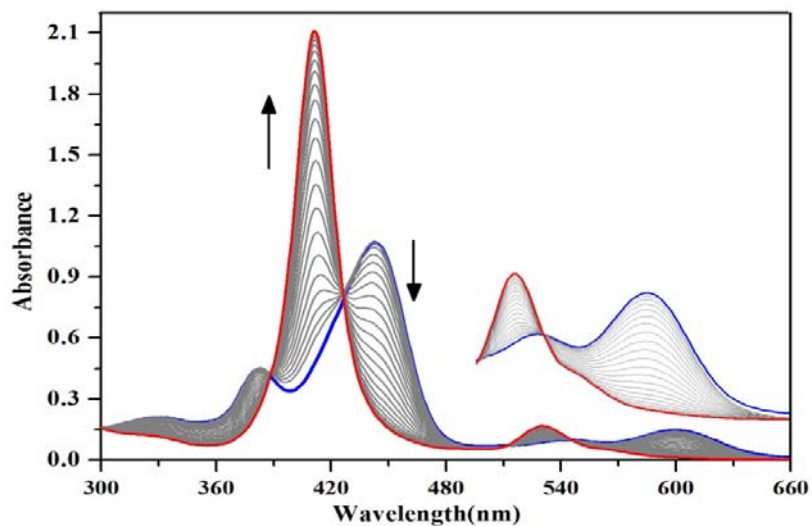

**Figure S38.** UV-Vis spectral response of **1** ( $8 \mu\text{M}$ ) upon incremental addition of  $\text{CN}^-$  ions ( $0$ - $3.15 \times 10^{-4} \text{M}$ ) in  $10\% \text{H}_2\text{O}:\text{MeCN}$ .

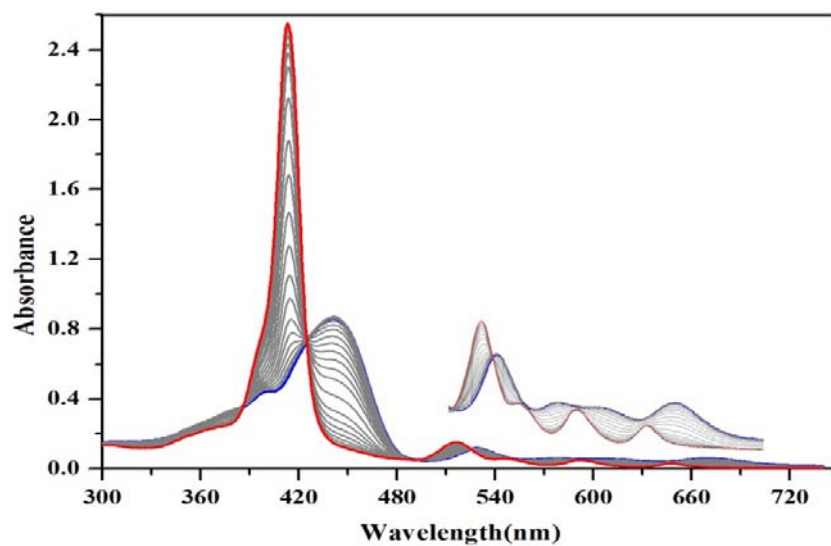

**Figure S39.** UV-Vis spectral response of **2** ( $8 \mu\text{M}$ ) upon incremental addition of  $\text{CN}^-$  ions ( $0$ - $3.45 \times 10^{-4} \text{M}$ ) in  $10\% \text{H}_2\text{O}:\text{MeCN}$ .

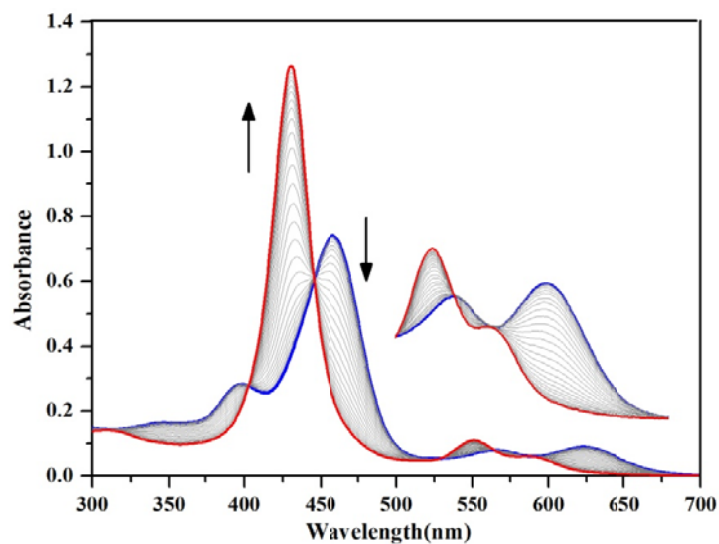

**Figure S40.** UV-Vis spectral response of **3** ( $8 \mu\text{M}$ ) upon incremental addition of  $\text{CN}^-$  ions ( $0-4.33 \times 10^{-4} \text{M}$ ) in 10%  $\text{H}_2\text{O}:\text{MeCN}$ .

**Table S4.** Detection limits (LOD) in toluene and 10%  $\text{H}_2\text{O}:\text{CH}_3\text{CN}$  at 298 K.

| Porphyrin              | LOD (toluene)<br>(in ppm) | LOD ( $\text{H}_2\text{O}:\text{CH}_3\text{CN}$ )<br>(in ppm) |
|------------------------|---------------------------|---------------------------------------------------------------|
| NiTPP-MN(1)            | 0.082                     | 1.64                                                          |
| $\text{H}_2$ TPP-MN(2) | 0.023                     | 1.84                                                          |
| NiOPP-MN(3)            | 0.073                     | 1.76                                                          |
| $\text{H}_2$ OPP-MN(4) | 0.058                     | -                                                             |

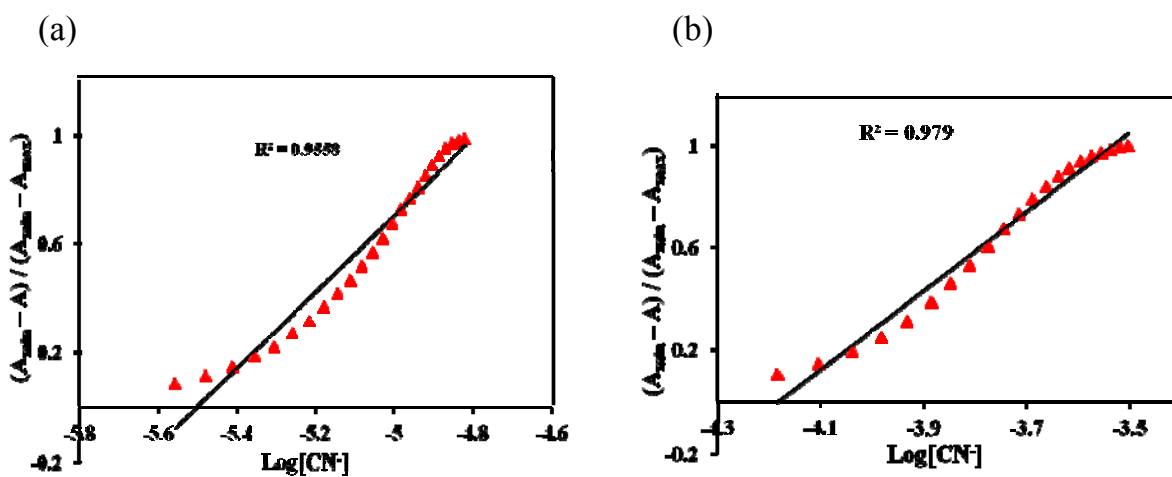

**Figure S41.** Absorbance of NiTPP-MN (**1**), normalized between the minimum absorbance found at zero equiv. of  $\text{CN}^-$  and the maximum absorbance (a) in toluene and (b) in 10%  $\text{H}_2\text{O}:\text{CH}_3\text{CN}$ .
